1  
2  
3  
4  
5  
6  
7  
8  
9  
10  
11  
12  
13  
14  
15  
16  
17

## **Ctf4 organizes sister replisomes and Pol $\alpha$ into a replication factory**

Zuanning Yuan<sup>1</sup>, Roxana Georgescu<sup>2,3</sup>, Ruda de Luna Almeida Santos<sup>1</sup>, Daniel Zhang<sup>3</sup>, Lin Bai<sup>1</sup>, Nina Y. Yao<sup>3</sup>, Gongpu Zhao<sup>4</sup>, Michael E. O'Donnell<sup>2,3\*</sup>, Huilin Li<sup>1\*</sup>

<sup>1</sup> Structural Biology Program, Van Andel Research Institute, Grand Rapids, Michigan, USA

<sup>2</sup> Howard Hughes Medical Institute

<sup>3</sup> DNA Replication Laboratory, The Rockefeller University, New York, New York, USA 10065

<sup>4</sup> David Van Andel Advanced Cryo-EM Suite, Van Andel Research Institute, Grand Rapids, Michigan, USA 49503

\*Equal corresponding authors. Correspondence should be addressed to M.O.D.

([odonnell@rockefeller.edu](mailto:odonnell@rockefeller.edu)) or H.L. ([Huilin.Li@vai.org](mailto:Huilin.Li@vai.org))

Key words: replication factory, sister replication forks, Ctf4/AND1, DNA replication, CMG helicase.

## 18 ABSTRACT

19 The current view is that eukaryotic replisomes are independent. Here we show that Ctf4 tightly  
20 dimerizes CMG helicase, with an extensive interface involving Psf2, Cdc45, and Sld5. Interestingly,  
21 Ctf4 binds only one Pol  $\alpha$ -primase. Thus, Ctf4 may have evolved as a trimer to organize two helicases  
22 and one Pol  $\alpha$ -primase into a replication factory. In the 2CMG-Ctf4<sub>3</sub>-1Pol  $\alpha$ -primase factory model, the  
23 two CMGs nearly face each other, placing the two lagging strands toward the center and two leading  
24 strands out the sides. The single Pol  $\alpha$ -primase is centrally located and may prime both sister replisomes.  
25 The Ctf4-coupled-sister replisome model is consistent with cellular microscopy studies revealing two  
26 sister forks of an origin remain attached and are pushed forward from a protein platform. The replication  
27 factory model may facilitate parental nucleosome transfer during replication.

28

## 29 INTRODUCTION

30 Replication of cellular genomes requires numerous proteins that work together in a replisome.  
31 Replication in eukaryotes utilize CMG helicase (Cdc45–Mcm2-7–GINS) (Ilves et al., 2010; Moyer et  
32 al., 2006; Costa et al, 2011), leading and lagging strand DNA polymerases (Pol)  $\epsilon$  and  $\delta$ , Pol  $\alpha$ -primase,  
33 PCNA clamps, the RFC clamp loader, and numerous accessory factors of less defined function (Bell and  
34 Labib, 2016; Burgers and Kunkel, 2017). Replication in eukaryotes is performed in localized foci in  
35 nuclei that contain 10-100 replication forks (Falaschi, 2000; Kitamura et al., 2006). Recent super  
36 resolution microscopy has resolved these foci into single replicon factories from bidirectional origins  
37 (Chagin et al., 2016; Saner et al., 2013). Nuclear foci in the budding yeast, *Saccharomyces cerevisiae*,  
38 most often contain only single replicon factories having two replication forks, although some foci  
39 consist of more than two replication forks (Saner et al., 2013). The molecular structure of a single core  
40 replicon factory unit, consisting of two replication forks is unknown, but several studies demonstrate  
41 that sister replication forks remain together during S phase (Conti et al., 2007; Falaschi, 2000; Ligasova  
42 et al., 2009; Natsume and Tanaka, 2010), and that sister double-strand (ds) DNA products are extruded  
43 in loops directed away from a replication protein scaffold (Gillespie and Blow, 2010; Saner et al., 2013).

44

45 Ctf4 (Chromosome Transmission Fidelity 4) is a homo-trimer (Ctf4<sub>3</sub>) that connects Pol  $\alpha$ -primase and  
46 CMG helicase (Gambus et al., 2009; Miles and Formosa, 1992; Simon et al., 2014; Tanaka et al.,  
47 2009a). Previous EM studies reveal that Ctf4<sub>3</sub>-Pol  $\alpha$ -primase resides on the opposite side of CMG from  
48 the leading strand DNA polymerase (Pol)  $\epsilon$  in an individual replisome (Sun et al., 2015) (**Figure 1a**).  
49 Ctf4 also transiently binds Dna2, Dpb2, Tof2 and Chl1, and thus Ctf4 is proposed to be a dynamic hub  
50 (Villa et al., 2016; Samora et al., 2016). Dynamic interaction enables multiple factors binding through  
51 time-sharing on Ctf4 and occurs through a conserved Ctf4-Interaction Peptide (CIP) motif (Kilkenny et  
52 al., 2017; Samora et al., 2016; Simon et al., 2014; Villa et al., 2016). The structures of the C-half of Ctf4  
53 and its human orthologue AND1 reveal a disc-shaped constitutive trimer via the  $\beta$ -propeller domains on  
54 the N-terminal face (N-face) with the three C-terminal helical domains interacting with up to three CIP  
55 peptides on the C-face (Kilkenny et al., 2017; Simon et al., 2014). Ctf4 mutants that disrupt connection  
56 to CMG are deficient in transfer of parental nucleosomes to the lagging strand daughter duplex, with  
57 implications for a role in epigenetic inheritance during development (Gan et al., 2018). In human, AND1  
58 (hCMG) also binds CMG and is important for replication progression and DNA repair (Kang et al.,  
59 2013; Abe et al., 2018; Williams and McIntosh, 2002; Yoshizawa-Sugata and Masai, 2009).

60

61 Earlier structure studies of Ctf4 used subassemblies of CMG and Pol  $\alpha$ -primase (Simon et al., 2014),  
62 and thus it has not been fully understood how Ctf4 interacts with the holoenzyme forms of CMG and Pol  
63  $\alpha$ -primase, and whether Ctf4 might bind two Pol  $\alpha$ -primase as proposed (**Figure 1a**). We sought to  
64 address these questions by a combination of biochemistry and cryo-EM and found that one Ctf4<sub>3</sub> binds  
65 CMG very tight, not dynamic, and can bind 1, 2, or 3 CMG holoenzymes without steric hinderance at a

66 120° angle to one another. We also determine a structure of Ctf4<sub>3</sub> bound to Pol α-primase and observe  
67 Ctf4<sub>3</sub> binds only one copy of Pol α-primase. We have reconstituted a 2CMG-2Pol ε-1Ctf4<sub>3</sub>-1Pol α-  
68 primase complex biochemically and can visualize a 2CMG-1Ctf4<sub>3</sub>-1Pol α-primase complex by EM.  
69 Moreover, the CMGs retain helicase activity while multimerized by Ctf4<sub>3</sub>. These findings led us to  
70 propose that sister-replisomes are coupled by Ctf4<sub>3</sub> in a “replication factory” of 2CMG-Pol  
71 ε-1Ctf4<sub>3</sub>-1Pol α-primase (**Figure 1b**). We further address in the Discussion how various CIP factors  
72 may bind the replication factory, how Pol α-primase may be utilized for lagging strand priming of sister  
73 replication forks, and implications of a factory for parental nucleosome transfer to daughter duplexes.  
74 We note that these *in vitro* findings require cellular validation, which will be pursued in a separate study.  
75

## 76 RESULTS

77 **CMG-Ctf4 form a stable complex.** To explore how Ctf4<sub>3</sub> interacts with replisome factors we  
78 performed glycerol gradient sedimentation of protein mixtures (**Figure 2 – figure supplement 1**). This  
79 method originally revealed that Pol ε binds CMG, forming a CMG-Pol ε complex that sediments faster  
80 than either component alone (compare panels c and h with panel d) (Langston et. al., 2014). CMG  
81 binding to Ctf4<sub>3</sub> was also readily apparent (compare panels c and g with panel e). It was initially  
82 surprising that the CMG-Ctf4<sub>3</sub> complex migrated heavier than CMG-Pol ε, even though Ctf4<sub>3</sub> is not  
83 quite as large as Pol ε, because studies in the human system indicated there was only room for one CMG  
84 on Ctf4 (Kang et al., 2013), consistent with an earlier proposal (Simon et al., 2014) (**Figure 2 - figure**  
85 **supplement 1**, compare panels d and e).

86  
87 To study the CMG-Ctf4<sub>3</sub> complex further we mixed Ctf4<sub>3</sub> and CMG and applied it to a MonoQ ion  
88 exchange column; a complex of CMG-Ctf4<sub>3</sub> eluted at >400 mM NaCl (**Figure 2a**). This result indicated  
89 CMG-Ctf4<sub>3</sub> is a stable complex, and is not loose, consistent with an apparent tighter interaction of GINS  
90 complex to Ctf4<sub>3</sub> compared to the CIP peptide of Sld5 (Simon et al., 2014). The MonoQ isolated CMG-  
91 Ctf4<sub>3</sub> complex was also stable to size-exclusion chromatography (SEC) (**Figure 2b**). We conclude that  
92 CMG is tightly bound and highly stable on the Ctf4<sub>3</sub> hub. Density scans of fractions within the SEC  
93 elution profile indicated a heterogeneous mixture of CMG-Ctf4<sub>3</sub> complexes, with CMG:Ctf4<sub>3</sub> ratios  
94 ranging from 3:1 to 1:1. We therefore examined different fractions by cryoEM and found that indeed,  
95 more than one CMG can bind Ctf4<sub>3</sub>, as described below.  
96

97 **Structure of the 1CMG-Ctf4<sub>3</sub> complex.** To investigate the structural basis underlying the strength of  
98 the CMG-Ctf4<sub>3</sub> complexes, we determined the structure of the 1CMG-Ctf4<sub>3</sub> complex by cryo-EM to  
99 3.9-Å resolution. In agreement with previous structural studies of CMG (Abid Ali et al., 2016; Yuan et  
100 al., 2016), the C-tier AAA+ ring of Mcm2-7 is highly dynamic. By excluding this region in 3D  
101 refinement, we improved the 3D map of 1CMG-Ctf4<sub>3</sub> to 3.8-Å resolution (**Figure 3a-c, Table 1, Figure**  
102 **3 - figure supplements 1 and 2**).

103  
104 Based on the density features, as well as previously reported separate structures of Ctf4<sub>3</sub> and CMG  
105 (Simon et al., 2014; Yuan et al., 2016), we built an atomic model (**Figures 3, 4, and Figure 4 - figure**  
106 **supplement 1, Video 1**). The overall architecture reveals an extensive interface between the helicase  
107 and Ctf4<sub>3</sub>, amounting to 1706 Å<sup>2</sup> of buried area, larger than the stable contact between Cdc45 and  
108 Mcm2-7 (1182 Å<sup>2</sup>) and between GINS and Mcm2-7 (1583 Å<sup>2</sup>), explaining the stability of the CMG-  
109 Ctf4<sub>3</sub> complex. Interestingly, there is a wide gap between Ctf4 and the Sld5 subunit of CMG that  
110 contains the CIP peptide (**Figure 4a**).

111  
112 There are three interfaces between CMG and Ctf4<sub>3</sub>, involving 3 different subunits of CMG with one  
113 protomer of Ctf4<sub>3</sub> (**Figure 4c,d,e; Figure 4 - figure supplement 2**). The two major interfaces are

114 between the  $\beta$ -propeller region of Ctf4 and both the Cdc45 subunit of CMG (**Figure 4c**) and the Psf2  
115 subunit in the GINS complex of CMG (**Figure 4d**); these interfaces were previously uncharacterized.  
116 The interactions between Cdc45 and the Ctf4 propeller are largely electrostatic, involving several salt  
117 bridges and hydrogen bonds. Furthermore, a loop connecting strands  $\beta 1$  and  $\beta 2$  of Psf2, disordered in  
118 the CMG structure in the absence of Ctf4<sub>3</sub> (Yuan et al., 2016), inserts into two blades of the  $\beta$ -propeller  
119 and becomes ordered by forming multiple interactions (**Figure 4d**). The interface between Psf2 and Ctf4  
120 involves H-bonds between Psf2 residues Arg34 and Lys36 with Ctf4 residues Asn850 and Tyr848,  
121 respectively, as well as hydrophobic interaction among Ctf4 residues Phe518, Leu770, and Pro771 and  
122 Psf2 residues Ile27, Phe28, and Pro29. As expected, the main Ctf4-contacting regions of Cdc45, Psf2 are  
123 well conserved across evolution (**Figure 4 – figure supplement 3**). The previously-identified  
124 interaction between Ctf4 and the CIP peptide in the Sld5 subunit (Simon et al., 2014) of the GINS  
125 complex is actually a minor interaction site in which the N-terminal residues 3–15 of Sld5 form a short  
126 helix that bundles with the helical domain of Ctf4, primarily via a hydrophobic interface (**Figure 4e**). An  
127 intervening long peptide (aa 16 -53) of Sld5 is disordered. This long flexible linker to the CIP peptide of  
128 Sld5 may explain why the CIP peptide of Sld5 is not required to observe CMG binding to Ctf4 in cells,  
129 predicting a second tethering point between CMG and Ctf4 (Simon et al., 2014). Therefore the Psf2 and  
130 Cdc45 extensive interfaces explain the stable association between Ctf4 and CMG.

131  
132 **The 2CMG-Ctf4<sub>3</sub> and 3CMG-Ctf4<sub>3</sub> complexes.** CryoEM 2D averages of two CMGs bound to Ctf4<sub>3</sub>  
133 show the CMGs are held rigidly, consistent with their stable binding to Ctf4<sub>3</sub> (**Figure 5a**). The 3D  
134 reconstruction shows each CMG interacts with only one protomer of Ctf4<sub>3</sub>, and the CMG contact is  
135 limited to one side of the Ctf4<sub>3</sub> triangle related by 120° (**Figure 5b**). While earlier 2D studies of Ctf4  
136 binding the GINS subassembly also observed a similar geometry, it has been thought that only one large  
137 CMG holoenzyme could bind Ctf4 (Kang et al., 2013; Simon et al., 2014). However the structure of  
138 2CMG-Ctf4<sub>3</sub> shows that the large CMGs do not sterically obstruct one another. Therefore, one Ctf4<sub>3</sub>  
139 may organize up to three CMGs. Indeed, we observed 2D class averages that show two or three CMGs  
140 per Ctf4<sub>3</sub>, related by the three-fold axis of Ctf4<sub>3</sub> (**Figure 5a, Figure 5 – figure supplements 1 and 2**).  
141 We determined the cryo-EM 3D maps of the 2CMG-Ctf4<sub>3</sub> complex at 5.8 Å resolution (**Figure 5b,**  
142 **Figure 5 – figure supplement 1, Video 2**) and the 3CMG-Ctf4<sub>3</sub> complex at 7.0 Å (**Figure 5 – figure**  
143 **supplement 2**), respectively. The interactions between individual CMG helicases and their respective  
144 partner Ctf4 protomers in both 2CMG-Ctf4<sub>3</sub> and 3CMG-Ctf4<sub>3</sub> complexes are virtually identical, the  
145 same as in the 1CMG-Ctf4<sub>3</sub> complex described above, consistent with no steric clash between the  
146 CMGs.

147  
148 Considering that the 2CMG-Ctf4<sub>3</sub> complex may be more physiologically relevant, as factories consisting  
149 of two forks straddling one origin are observed in vivo (Saner et al., 2013), and a 2CMG occupancy of  
150 Ctf4<sub>3</sub> leaves one protomer of Ctf4<sub>3</sub> for other CIP factors such as Pol  $\alpha$ -primase, we continue this report  
151 in the context of the 2CMG-Ctf4<sub>3</sub> complex.

152  
153 The key insight from the 2CMG-Ctf4<sub>3</sub> structure is that the two CMGs are held on the same side – the  
154 top side, or the N-face of the disc-shaped Ctf4<sub>3</sub> when the structure is viewed from the side of the Ctf4<sub>3</sub>  
155 disk (**Figure 5b**). Hence, the two N-tier rings of the Mcm2-7 hexamers – where the dsDNAs approach  
156 for dsDNA unwinding (Georgescu et al., 2017; Douglas et al., 2018) – approximately face one another  
157 at an angle of 120° and the C-tier motor rings of the two CMGs, where the leading strand Pol  $\epsilon$ 's bind  
158 (Sun et al., 2015), face outwards and away from each other.

159  
160 **A 1:1 complex of Ctf4<sub>3</sub> and Pol  $\alpha$ -primase.** Earlier studies observed only one Pol  $\alpha$ -primase bound to  
161 Ctf4<sub>3</sub> (Simon et al., 2014) (see their Fig. 4e and Extended data Figs. 8 and 9). We wished to understand

162 the basis of this stoichiometry but the interaction of Ctf4<sub>3</sub> to Pol α-primase was too loose to isolate a  
163 complex for cryoEM analysis, consistent with the dynamic hub model of Ctf4<sub>3</sub> (Simon et al., 2014; Villa  
164 et al., 2016). Thus we directly mixed Pol α-primase and Ctf4<sub>3</sub> at 1:1 and 3:1 molar ratios followed by  
165 cryoEM analysis to study how Pol α-primase binds Ctf4<sub>3</sub> in the absence of CMG.  
166

167 We first examined Pol α-primase alone and found Pol α-primase was flexible when frozen in vitreous  
168 ice, and did not generate well-defined 2D class averages. But under negative-stain EM conditions, Pol  
169 α-primase was sufficiently stabilized on carbon film to yield a bi-lobed shape with the two lobes ~120 Å  
170 apart (**Figure 6a**). This architecture is essentially the same as a previous negative-stain EM study, in  
171 which one lobe is assigned to the catalytic NTD of Pol1 (Pol1-NTD) and the other lobe to the CTD of  
172 Pol1, plus the B-subunit and the L- and S-subunits of the primase (Nunez-Ramirez et al., 2011). Cryo-  
173 EM of Ctf4<sub>3</sub> alone produced 2D class averages that are consistent with the crystal structure (**Figure 6b**).  
174 Cryo-EM 2D class averages of a 1:1 molar ratio mixture of Ctf4<sub>3</sub> and Pol α-primase yielded a structure  
175 comprised of Ctf4<sub>3</sub> bound to one catalytic Pol1-NTD of Pol α-primase (**Figure 6c, Figure 6 – figure**  
176 **supplement 1, Table 2**). Increasing the Pol α:Ctf4<sub>3</sub> ratio to 3:1 did not change the 1:1 binding with  
177 Ctf4<sub>3</sub> (**Figure 6 - figure supplement 2**). The presence of the Pol lobe, but absence of the primase lobe  
178 in the 2D class averages is consistent with previous studies showing a high degree of flexibility between  
179 the primase and polymerase lobes (Baranovskiy and Tahirov, 2017; Nunez-Ramirez et al., 2011; Perera  
180 et al., 2013). The 2D averages reveal two contacts between Ctf4<sub>3</sub> and Pol1-NTD, but only one of the two  
181 contacts is visible in the 3D map (**Figure 6c-d**). These interactions must be weak and flexible, with one  
182 contact becoming averaged out in 3D reconstructions, and accounting for the low 12-Å resolution of the  
183 3D map.  
184

185 The crystal structures of Ctf4<sub>3</sub> and Pol1-NTD complexed with a primed DNA-dNTP fit well as two  
186 separate rigid-bodies in the upper and lower densities of the Ctf4<sub>3</sub>-apo Pol1-NTD 3D map, respectively.  
187 The docking suggests that the primer-template duplex exits the Pol1-NTD from the bottom face (**Figure**  
188 **6d, Figure 6 – figure supplement 1**). We added a three-fold excess of Pol α-primase to Ctf4<sub>3</sub>, but did  
189 not observe more than one molecule of Pol α-primase bound to the Ctf4 trimer (**Figure 6 – figure**  
190 **supplement 2**), consistent with the previous observations (Simon et al., 2014). The Pol1-NTD occupies  
191 most of the bottom C-face of Ctf4<sub>3</sub> (**Figure 6d, Figure 6 – figure supplement 1**), appearing to sterically  
192 occlude additional molecules of Pol α-primase and thus explaining the single Pol α-primase-to-Ctf4<sub>3</sub>  
193 stoichiometry. Notably, in a factory complex with two tightly bound CMGs, there would still remain a  
194 vacant CIP site in Ctf4<sub>3</sub> for binding of dynamic partner proteins, such as Pol α-primase and other CIP  
195 factors (see Discussion).  
196

197 **Reconstitution and characterization of a 2CMG-Ctf4<sub>3</sub>-1Pol α-primase complex.** To investigate  
198 complex formation among CMG, Ctf4<sub>3</sub> and DNA polymerases, we analyzed by densitometry the  
199 sedimentation analyses of a mixture of CMG+Ctf4<sub>3</sub> with DNA Pol α-primase and Pol ε. This protein  
200 mixture produced a large super-complex that surpassed the size of CMG-Ctf4<sub>3</sub> and the Pol ε-CMGE  
201 complexes (**Figure 1 – figure supplement 1**). Interestingly, the bulk of excess Ctf4<sub>3</sub> is excluded from  
202 the large complex suggesting some type of cooperative assembly. Gel scans indicate a stoichiometry of  
203 two CMG-Pol ε, one Ctf4<sub>3</sub>, one Pol α-primase (**Figure 7 – figure supplement 1**), although we can't  
204 exclude a possible mixture of complexes. Upon mixing CMG+Ctf4<sub>3</sub>+Pol α-primase we observed a  
205 2CMG-1Ctf4<sub>3</sub>-1Pol α-primase complex by negative stain EM (**Figure 7 – figure supplement 2**).  
206

207 We investigated cooperativity of CMG and Pol α-primase binding to Ctf4 by pull-down assays (**Figure**  
208 **7a**). Pull-down assays using immobilized Ctf4<sub>3</sub> showed an 8-fold increase of Pol α-primase retained on  
209 Ctf4<sub>3</sub> when CMG was present, and conversely, more CMG bound to Ctf4<sub>3</sub> when Pol α-primase was



210 present, suggesting cooperativity (**Figure 7a**). Cooperativity is consistent with densitometry of CMG-  
211 Pol  $\epsilon$ -1Ctf4<sub>3</sub>-1Pol  $\alpha$ -primase isolated in a glycerol gradient which excludes most of the Ctf4 trimer  
212 (**Figure 7 – figure supplement 1**). Negative stain EM also shows a 2CMG-Ctf4<sub>3</sub>-1Pol  $\alpha$ -primase  
213 complex (**Figure 7 – figure supplement 2**). The spontaneous and cooperative assembly of this complex  
214 in vitro suggests that the complex may also form in cells and possibly underlies the observations that  
215 sister replisomes are held together in cells (Chagin et al., 2016; Saner et al., 2013).

216  
217 To determine if multimers of CMG bound to Ctf4 retain activity, and thus could operate on two forks at  
218 the same time, we performed helicase and replication assays comparing CMG with 2CMG + 1Ctf4<sub>3</sub>  
219 (preincubated to form 2CMG-Ctf4<sub>3</sub> complex as in **Figure 2**) (**Figure 7b-d**). Many reports utilize  
220 ATP $\gamma$ S in a preincubation to enable CMG binding the DNA, and preincubation assays indicated that a  
221 10 min preincubation at 30°C with ATP $\gamma$ S was sufficient for CMG to bind the short DNA for helicase  
222 assays (**Figure 7 – figure supplement 3**). Helicase activity was initiated after the 10-min preincubation  
223 by adding 5 mM ATP. The results demonstrate that 2CMG-Ctf4<sub>3</sub> retains essentially the same helicase  
224 activity compared to CMG alone (**Figure 7c**), confirming that CMG retained helicase activity while  
225 multimerized by Ctf4<sub>3</sub>. We also tested other ratios of CMG to Ctf4<sub>3</sub> that lack the preincubation step, and  
226 may measure binding and unwinding; the same activity was observed using CMG alone or multimerized  
227 onto Ctf4<sub>3</sub> (**Figure 7 – figure supplement 3**).

228  
229 We tested the effect of preincubation with ATP $\gamma$ S for replication activity on a <sup>32</sup>P-primer forked DNA,  
230 which when compared to the helicase substrate has a much longer 3' ssDNA tail, a primer duplex  
231 region, and Pol  $\alpha$ -primase in the preincubation (**Figure 7 – figure supplement 4**). The results indicate a  
232 preincubation of 30 min with ATP $\gamma$ S for the primed replication fork. Thus, for replication assays we  
233 used a 30-min preincubation with ATP $\gamma$ S prior to adding dNTPs and 5mM ATP (**Figure 7d**).  
234 Comparison of CMG+Pol  $\alpha$ -primase vs 2CMG+Ctf4<sub>3</sub>+Pol  $\alpha$ -primase showed that CMG retained full  
235 replication activity while multimerized by Ctf4<sub>3</sub>, again indicating that CMGs multimerized by Ctf4<sub>3</sub> are  
236 functional. In further support of these results, DNA replication assays of pre-formed isolated CMG-  
237 Ctf4<sub>3</sub> complexes, preincubated for 2 min with 0.1 mM ATP (beneath the threshold of unwinding, see  
238 **Figure 7b**), show that when equal amounts of Ctf4<sub>3</sub> in the various CMG-Ctf4 complexes are added to  
239 replication assays, the 1.7CMG-Ctf4<sub>3</sub> gives about twice the activity of 1CMG-Ctf4<sub>3</sub>, most simply  
240 explained by the presence of the extra CMG in 1.7CMG-Ctf4<sub>3</sub> vs 1CMG-Ctf4<sub>3</sub> (**Figure 7 – figure**  
241 **supplement 4**). Therefore, CMG helicases are active in replication when multimerized by Ctf4<sub>3</sub>.

242  
243 **Atomic model for a replication factory.** In light of cell-based studies that observe that sister  
244 replisomes generated from a bidirectional origin are physically coupled such that the two sister duplexes  
245 extrude together away from a point source (Chagin et al., 2016; Saner et al., 2013; Natsume and Tanaka,  
246 2010), and on the basis of our cryo-EM and biochemical analysis, we propose that the observed factory  
247 in cells is explained by one Ctf4<sub>3</sub> that coordinates two CMGs and one Pol  $\alpha$ -primase to form a  
248 2CMG–1Ctf4<sub>3</sub>–1Pol  $\alpha$ -primase core replisome factory. While we observed this core replisome factory  
249 in negative stain EM (**Figure 7 – figure supplement 2**), we were unable to reconstruct the full 2CMG-  
250 Ctf4<sub>3</sub>-Pol  $\alpha$ -primase by cryo-EM analysis, and therefore we obtained an atomic model for this super-  
251 complex factory by superimposing the shared Ctf4<sub>3</sub> in the atomic model of 2CMG–Ctf4<sub>3</sub> with that of  
252 Pol  $\alpha$ -Ctf4<sub>3</sub> (**Figure 8a-b, Figure 8 – figure supplement 1, Video 3**). The model indicates a factory  
253 complex that contains two CMGs on the sides of the Ctf4 disk, and one Pol  $\alpha$ -primase on the C-face of  
254 the Ctf4 disk. The protein complex consisting of 26 visually observed polypeptides in this >2 MDa  
255 factory model give no steric clash among them. This model may explain why Ctf4 has evolved to  
256 assemble a trimer, not a dimer, in order to tightly coordinate two CMG helicases, leaving one Ctf4  
257 protomer to bind transient CIP factors such as Pol  $\alpha$ -primase. Such a structure, operating at a level

258 above the individual replisome, may represent the functional unit of a cellular replicon core factory  
259 derived from one bidirectional origin as implicated by cellular and microscopy studies (Chagin et al.,  
260 2016; Saner et al., 2013). Our dimeric CMG replication factory model suggests possible coordination of  
261 the two forks that arise from an origin of replication. As the sister forks grow, the duplicated leading and  
262 lagging strands would form loops that push the nascent sister DNAs out from the factory surface a  
263 scenario that resembles the proposed replication factory model based on cellular studies (summarized in  
264 **Figure 8 – figure supplement 2**) (Chagin et al., 2016; Saner et al., 2013).

## 266 Discussion

267 The factors that mediate the association of different replisomes and how a replication factory looks like  
268 have been unknown. The cryo-EM and biochemical studies presented here suggest a higher order  
269 architecture of the replication machinery beyond an individual replisome and propose that Ctf4 has  
270 evolved as a trimer to simultaneously organize two CMGs and one Pol  $\alpha$ -primase by forming a 2CMG-  
271 Ctf4<sub>3</sub>-1Pol  $\alpha$ -primase factory. Our factory model conceptually advances on the previous view in which  
272 Ctf4<sub>3</sub> binds a single CMG of an individual replisome (**Figure 1a**) (Simon et al., 2014; Villa et al., 2016).  
273 However, we note that individual replisomes with 1CMG-Ctf4<sub>3</sub> and replisome factories with 2CMG-  
274 Ctf4<sub>3</sub> are not mutually exclusive and that until the factory is confirmed to operate inside the cell, the  
275 conclusions drawn here should be regarded as preliminary.

276  
277 **1. Mechanism of bidirectional replication by a replication factory.** A factory complex containing a  
278 stable 2CMG-Ctf4<sub>3</sub> is consistent with cell-based studies and light microscopy of replicating DNA in *S.*  
279 *cerevisiae* cells (Conti et al., 2007; Falaschi, 2000; Kitamura et al., 2006; Ligasova et al., 2009; Natsume  
280 and Tanaka, 2010), where sister replication forks are shown by super resolution confocal microscopy  
281 with fluorescent markers on DNA to be physically associated within a twin fork replication factory at  
282 bidirectional origins and that the daughter duplexes are extruded together from a common protein  
283 platform (Kitamura et al., 2006; Saner et al., 2013). The model is also consistent with super resolution  
284 microscopy of mammalian replication nuclear foci revealing they are comprised of several single  
285 replication factories, each of which represents one bidirectional origin replicon (Chagin et al., 2016).

286  
287 In the 2CMG factory model (**Figure 8**), the two helicases stand sideways above the Ctf4<sub>3</sub> disk, with  
288 their respective N-tier rings of the two Mcm2-7 hexamers facing approximately 120° to each other.  
289 Previous studies show that the leading strand enters the N-tier of CMG and proceeds through the central  
290 channel of CMG to engage the leading strand Pol  $\epsilon$  located at the C-tier of CMG (Georgescu et al.,  
291 2017; Goswami et al., 2018). Therefore, at the core of the replication factory, the two parental duplexes  
292 enter their respective CMGs at the N-tier where each duplex is unwound by steric exclusion (Fu et al.,  
293 2011; Georgescu et al., 2017; Langston and O'Donnell, 2017; Goswami et al., 2018; Kose et al., 2019).  
294 In the core replication factory model, two parental duplexes can easily be engaged at the N-tiers of each  
295 CMG due to their 120° orientation, and the lagging strand is deflected off the top of the N-tier ring after  
296 embrace of the parental duplex by the zinc fingers that encircle dsDNA (Georgescu et al., 2017; Li and  
297 O'Donnell, 2018; O'Donnell and Li, 2018; Goswami et al., 2018). Therefore, the unwound leading  
298 strands travel through the horizontal central channels of CMGs to exit the left and right sides of the  
299 replication factory at their respective CMG C-tier to which the leading Pol  $\epsilon$  binds.

300  
301 **2. Pol  $\alpha$ -primase is flexibly associated in the replisome.** Given the high degree of flexibility between  
302 the Pol and primase lobes of Pol  $\alpha$ -primase, it seems likely that only one lobe or the other will be  
303 observed in the EM depending on which lobe is more “fixed” in place. In an earlier study that contained  
304 CMG-Pol  $\epsilon$ -Ctf4-Pol  $\alpha$ -primase-forked DNA, a density from Pol  $\alpha$ -primase was observed at the N-tier  
305 of the Mcm ring (Sun et al., 2015). Given that the p48/p58 primase subunits interact with Mcm3, Mcm4,

306 and Mcm6 (You et al., 2013), the Pol  $\alpha$ -primase density was most likely the primase lobe. Pol 1 of Pol  
307  $\alpha$ -primase binds directly to Ctf4<sub>3</sub> (Simon et al., 2014), and in the present study the Ctf4-Pol  $\alpha$ -primase  
308 structure is solved in the absence of CMG and DNA. Therefore it is the the Pol1 lobe instead of the  
309 primase lobe that is stabilized on Ctf4. Thus, the current study and the earlier study are compatible, but  
310 observe different lobes of Pol  $\alpha$ -primase. At the time of the earlier work (Sun et al., 2015), the dimeric  
311 replisome images were observed but discarded, because we did not know how to interpret those images.  
312

313 **3. Either one or more Pol  $\alpha$ -primases may prime the two lagging strands of the coupled sister**  
314 **forks.** The lagging strands displaced off the N-tier rings of their respective Mcm2-7 hexamers are near  
315 the center between the two CMGs. Such lagging strand positioning allows for and raises the possibility  
316 that the single Pol  $\alpha$ -primase may prime both lagging strands. The catalytic Pol1 NTD of Pol  $\alpha$ -primase  
317 binds to the bottom C-face of the Ctf4<sub>3</sub> disk (**Figures 6d, Figure 6 – figure supplement 1**). The primase  
318 lobe is not visible in the 3D map of Ctf4<sub>3</sub>-Pol  $\alpha$ -primase of this report, but the Pol1-NTD lobe and  
319 primase lobe of the bi-lobed Pol  $\alpha$ -primase are known to be separated by a distance of ~120 Å and  
320 connected via a flexible tether that provides a 70° range of motion between the primase and polymerase  
321 lobes, sufficiently long to contact both CMGs in the factory (**Figure 8, and Figure 8 - figure**  
322 **supplement 1**) (Baranovskiy and Tahirov, 2017; Nunez-Ramirez et al., 2011; Perera et al., 2013).  
323 Because the primase functions upstream of the Pol 1 subunit of Pol  $\alpha$ , and binds the Mcms (You et al.,  
324 2013), it is likely that the primase lobe extends upwards passing the 45-Å-thick Ctf4<sub>3</sub> disc to reach past  
325 the N-face of Ctf4<sub>3</sub>, placing the primase between the two N-tier rings of the helicases where the two  
326 lagging strands are first produced (**Figures 1b and 8a, b**). Therefore, the primase subunits can come in  
327 contact with and thereby prime both lagging strands.  
328

329 However, we do not expect that only one Pol  $\alpha$ -primase molecule functions for both lagging strands in a  
330 replication factory for several reasons. First, Pol  $\alpha$ -primase is fully competent to prime the lagging  
331 strand in the absence of Ctf4 in vitro using pure proteins, and is dependent on CMG not Ctf4 for  
332 function (Georgescu et al., 2015b; Yeeles et al., 2015; Yeeles et al., 2017), indicating that Ctf4 is not  
333 required for replication fork operations per se. Second, the dynamic binding of Pol  $\alpha$ -primase to Ctf4 in  
334 the dynamic Ctf4 hub view (Villa et al., 2016), especially given the weak binding of the Pol 1 CIP  
335 peptide, would only enable a single Pol  $\alpha$ -primase to stay bound to Ctf4 for a few seconds or less.  
336 Therefore even individual replisomes containing Ctf4 would utilize numerous Pol  $\alpha$ -primase binding  
337 events over the time needed to repeatedly prime one lagging strand during replisome progression.  
338

339 **4. Multiple CIP factors may still access Ctf4 in the replisome factory.** The currently identified CIP  
340 factors include Pol  $\alpha$ -primase, CMG, Chl1, Dpb2, Tof2, and Dna2; the Pol  $\alpha$ -primase, CMG, Dna2, and  
341 Chl1 bind the same consensus CIP site of Ctf4, whereas Tof2 and Dpb2 bind a distinct site on Ctf4  
342 (Samora et al., 2016; Villa et al., 2016). The ability of Ctf4<sub>3</sub> to bind several different factors is proposed  
343 to depend on time-sharing due to weak CIP peptide binding with rapid on/off rates to Ctf4, similar to  
344 PCNA binding factors via a conserved PIP (PCNA Interaction Peptide) motif, reviewed in (Georgescu et  
345 al., 2015a). Given the tight interaction of 2 CMGs to Ctf4<sub>3</sub>, we envision three different pathways for CIP  
346 proteins to bind Ctf4<sub>3</sub> in a replication factory. The first, and simplest, is that the transient binding of  
347 Pol  $\alpha$ -primase will often vacate one Ctf4 subunit, making it available for other CIP proteins. Indeed,  
348 given Pol  $\alpha$ -primase still functions in vitro without Ctf4 (Georgescu et al., 2015b; Yeeles et al., 2015;  
349 Yeeles et al., 2017), this particular CIP site may often be available for other CIP factors to bind. Second,  
350 the Chl1 helicase and Dna2 nuclease are required under particular cellular conditions, during which the  
351 replisome may change composition, and this has precedence in the rapid and dynamic rearrangements of  
352 proteins in the *E. coli* replisome (Indiani et al., 2009; Lewis et al., 2017). Third, the structures of this  
353 report show that the CIP peptide of CMG (in Sld5) is located across a wide gap between CMG and Ctf4,



354 and the CIP sequence only contacts Ctf4 at the end of a long flexible linker in Sld5. The  $K_d$  of the Sld5  
355 CIP peptide to Ctf4 is only 5  $\mu\text{M}$  and can even be deleted without preventing CMG-Ctf4 interaction in  
356 living cells (Simon et al., 2014). Given the flexible loop that mediates the Sld5 CIP peptide in the CMG-  
357 Ctf4 complex, the Sld5 CIP peptide likely retains the rapid  $k_{\text{off}}$  implied by the 5  $\mu\text{M}$   $K_d$  and thus can be  
358 expected to vacate the Ctf4 CIP site frequently (i.e. milliseconds). While speculative, it is also possible  
359 the Sld5 CIP peptide within CMG may be regulated by other proteins, or that other CIP factors that have  
360 additional contacts to Ctf4 that can outcompete the weakly bound Sld5 CIP peptide.

361

362 **5. Independent replisomes and the twin CMG factory model are not mutually exclusive.** The  
363 current report demonstrates that two (or three) CMG can bind Ctf4 tightly, that CMGs bound to the Ctf4  
364 trimer retain activity, and that a complex of 2(CMG-Pol  $\epsilon$ )-1Ctf4<sub>3</sub>-1Pol  $\alpha$ -primase spontaneously  
365 assembles in vitro. In vitro single molecule studies in *S. cerevisiae* extracts and *Xenopus* extracts  
366 demonstrate that individual replisomes can move apart in opposite directions from an origin and contain  
367 only one CMG apiece (Duzdevich et al., 2015; Yardimci et al., 2010). While these experiments reveal  
368 that replisomes can act individually, these experiments utilize DNA tethered at both ends and thus DNA  
369 looping needed in our factory model would not be observed. Thus if factories were present, only when  
370 they dissociate to form independent forks would replication forks on doubly tethered DNA be  
371 visualized. Alternatively, *Xenopus* egg extracts may be programmed to replicate a bit differently from  
372 normal cells. It is worth noting that neither the model of an individual replisome nor the model of a  
373 dimeric replisome factory have been proven to exist inside cells. Because the same proteins are present  
374 in both models, they may not be mutually exclusive and may both exist in cells. If true, the different  
375 models may even fulfill distinct functions. Clearly, cellular studies are needed to untangle these scenarios.

376

377 **6. Implications of a replisome factory on nucleosome distribution.** During replication the epigenetic  
378 marks on nucleosomes are distributed nearly equally to the two daughter duplexes (Gan et al, 2018;  
379 Petryk et al., 2018; Yu et al., 2018). The general view is that the H3H4 tetramer, which carries the bulk  
380 of epigenetic marks, binds DNA tightly and is transferred to nascent DNA independent of H2A/H2B  
381 dimers that are easily displaced and exchanged (Alabert et al., 2017). Two binding sites for H3H4 exist  
382 in the replisome: The N-terminal region of Mcm2 binds H3H4 (Huang et al., 2015; Richet et al., 2015),  
383 and the Dpb3/4 subunits of Pol  $\epsilon$  bind H3H4 at the C-face of CMG (Bellelli et al., 2018; Tackett et al.,  
384 2005; Sun et al, 2015). Recent studies have found specific roles of these H3H4 sites in transfer of  
385 parental histones to daughter DNAs during replication (Gan et al., 2018; Petryk, et al., 2018; Yu et al.,  
386 2018; Evrin. et al., 2018). Moreover, the N-terminal region of Pol 1 (i.e. the DNA Pol of Pol  $\alpha$ -primase)  
387 binds H2A/H2B, and mutations in either Pol 1, Mcm2 or Ctf4 have a negative effect on transfer of  
388 parental histone marks to the lagging strand duplex (Evrin et al., 2018; Gan et al., 2018). Hence Mcm2-  
389 Ctf4-Pol  $\alpha$  forms an “axis” for nucleosome transfer from parental DNA to the lagging daughter DNA  
390 (Gan et al., 2018). If only one Pol  $\alpha$ -primase exists for two replication forks as in our 2CMG-Ctf4  
391 factory model, during the time for transfer of a parental H3H4 to the lagging strand of one fork, the  
392 other fork in the opposite CMG would have progressed the same distance for transfer of another parental  
393 H3H4 to the leading strand. In this view, the architecture of our factory model facilitates the observed  
394 equal transfer of histones to both leading and lagging strand products (Gan et al, 2018; Petryk et al.,  
395 2018; Yu et al., 2018).

396

397 There is another aspect of the replisome factory architecture that may play a role in the proposed Mcm2-  
398 Ctf4-Pol  $\alpha$  axis of nucleosome distribution. Two Mcm2's are needed to bind one H3H4 tetramer (Huang  
399 et al., 2015; Richet, et al., 2015). In our structure, Mcm2 is ordered from Pro-201, and there is a 200  
400 residue long peptide that is intrinsically disordered. So the H3H4 binding site (residues 61-130) is within  
401 this unstructured peptide. In our factory model, the two Mcm2's, one from each CMG helicase, may  
402 project out a pair of long tentacles (Mcm2 residues 1-200) between the two CMGs, and the two tentacles

403 would conspire to capture one H3H4 to allow the “Mcm-Ctf4-Pol  $\alpha$  “axis” to participate in equal  
404 deposition of parental histone marks on both strands of wt cells, much like the single Pol  $\alpha$ -primase in  
405 the factory. An alternative to the use of two Mcm2’s is that the H3H4 tetramer could be split so that one  
406 H3H4 dimer is bound by one Mcm2 and one Asf1 (Huang et al., 2015; Richet et al., 2015, add Wang et  
407 al Protein and cell 2015, 693-7). However, mass spectrometry studies indicate that the H3H4 tetramer  
408 remains intact during replication (Xu et al., 2010).

409  
410 Interestingly, Okazaki fragments are sized relative to the nucleosome repeat (Smith and Whitehouse,  
411 2012). If nucleosome transfer is coordinated with Okazaki fragment synthesis, the parental nucleosome  
412 will occupy approximately the same sequence on the nascent DNA as it did on the parental DNA, as  
413 observed experimentally (Madamba et al., 2017). To conclude, the current study is only the beginning of  
414 a comprehensive understanding of how replication is organized in the cell. We expect that additional  
415 proteins, further layers of organization, and yet to be determined dynamics exist in nuclear replication  
416 factories. The replisome architecture and actions in the context of chromatin and epigenetic inheritance  
417 are important areas for future research.

418  
419

## 420 METHODS

421

422 **Reagents.** Radioactive nucleotides were from Perkin Elmer and unlabeled nucleotides were from GE  
423 Health-care. Protein concentrations were determined using the Bio-Rad Bradford Protein stain using  
424 BSA as a standard. Purification of *S. cerevisiae* Pol  $\alpha$ -primase, Pol  $\epsilon$ , CMG, the C-terminal half of Ctf4  
425 (residues 471-927), and full length Ctf4 were purified according to previously published procedures  
426 (Georgescu et al., 2014; Langston et al., 2014). The C-terminal half of Ctf4 is necessary and sufficient  
427 for Ctf4 binding to CMG and Pol  $\alpha$ -primase, as shown previously (Simon et al., 2014).  
428 Oligonucleotides were from ITG (Integrated DNA Technologies). ATP $\gamma$ S used for experiments in this  
429 report were purchased from Roche (catalog 11162306001).

430

431 **EM sample preparation of CMG-Ctf4<sub>3</sub> complexes.** CMG (3.36 nmol) was mixed with Ctf4<sub>3</sub> (1.7  
432 nmol) in a final volume of 1.37 ml of buffer A (20 mM Tris-acetate (pH 7.6), 1 mM DTT, 2 mM  
433 magnesium acetate) plus 200 mM KCl. The mixture was incubated on ice for 30 min, then injected onto  
434 a 0.25 ml MonoQ column equilibrated in buffer A + 200 mM KCl. The column was eluted with a 20-  
435 column linear gradient of buffer A + 200 mM KCl to buffer A + 600 mM KCl. Fractions of 0.25 ml  
436 were collected and protein concentration was determined using the Bio-Rad Bradford Protein stain and  
437 BSA as a standard. Fractions were analyzed in a Commassie stained 8% SDS-polyacrylamide gel and gel  
438 lanes were scanned using a Typhoon 9400 laser imager (GE Healthcare). Scanned gels were analyzed  
439 using ImageQuant TL v2005 software and the two peak fractions were pooled and concentrated to 8.5  
440 mg/ml in 79  $\mu$ l. The sample was mixed with a 4-fold excess of a DNA 20-mer (5'-Cy3-dTdT<sub>biotin</sub>dT<sub>18</sub>)  
441 oligonucleotide, 0.2 mM AMPPNP (final) which binds CMG. The sample was incubated 2 h on ice then  
442 applied onto a Superose 6 Increase 3.2/300 gel filtration column (GE Healthcare) equilibrated in 20 mM  
443 Tris-acetate (pH 7.5), 1 mM DTT, 2 mM magnesium acetate, 60 mM potassium glutamate, 0.1 mM  
444 AMPPNP. The Cy3 DNA was added to visualize elution of CMG-Ctf4 at 565 nm, along with  
445 monitoring elution at 280 nm. Fractions were analyzed by SDS-PAGE and scanned on a Typhoon 9400  
446 laser imager (GE Healthcare) to estimate the stoichiometry of CMG-to-Ctf4 in each fraction. The  
447 samples used for analysis were fraction 37 (0.35 mg/ml), fraction 35 (0.48 mg/ml), fraction 33 (0.42  
448 mg/ml) and fraction 31 (0.35 mg/ml).

449

450 **Cryo-EM of Ctf4<sub>3</sub>, Ctf4<sub>3</sub>-Pol  $\alpha$ -primase and Ctf4<sub>3</sub>-CMG complexes.** To prepare cryo-EM grids,  
451 individual fractions of CMG-Ctf4<sub>3</sub> from the gel filtration column were dialyzed against buffer A and  
452 concentrated to 0.35-0.48 mg/ml. Then 3  $\mu$ l aliquots were applied to glow-discharged C-flat 1.2/1.3  
453 holey carbon grids, incubated for 10 seconds at 6 °C and 95% humidity, blotted for 3 s then plunged into  
454 liquid ethane using an FEI Vitrobot IV. In C-flat R1.2/1.3 holey carbon film grids, the CMG-Ctf4<sub>3</sub>  
455 particles distributed well for each of the samples. The Ctf4<sub>3</sub>-CMG grids were loaded into an FEI Titan  
456 Krios electron microscope operated at a high tension of 300 kV and images were collected semi-  
457 automatically with EPU under low-dose mode at a nominal magnification of  $\times$ 130,000 and a pixel size  
458 of 1.074 Å per pixel. A Gatan K2 summit direct electron detector was used under super-resolution mode  
459 for image recording with an under-focus ranging from 1.5 to 2.5  $\mu$ m. A Bioquantum energy filter  
460 installed in front of the K2 detector was operated in the zero-energy-loss mode with an energy slit width  
461 of 20 eV. The dose rate was 10 electrons per Å<sup>2</sup> per second and total exposure time was 6 s. The total  
462 dose was divided into a 30-frame movie so each frame was exposed for 0.2 s. Approximately 5,900 raw  
463 movie micrographs were collected.

464

465 Analysis of Ctf4<sub>3</sub> used a sample of Ctf4<sub>3</sub> at 1.8 mg/ml in 20 mM Tris-acetate (pH 7.5), 1 mM DTT, 2  
466 mM magnesium acetate, 60 mM potassium glutamate. For the Pol  $\alpha$ -primase-Ctf4 EM analysis we were  
467 unable to isolate a complex between these weak interacting components. Hence, we directly mixed the  
468 proteins for EM analysis. The samples contained Ctf4<sub>3</sub> and Pol $\alpha$ -primase complex either at 1:1 molar

469 ratio at a final concentration of 2.25 mg/ml, or at 1:3 molar ratio at a final concentration of 1.75 mg/ml,  
470 in 20 mM Tris-Acetate pH 7.5, 0.5 mM EDTA, 100 mM KGlutamate and incubated 20 minutes on ice.  
471 The samples were then applied to grids and plunge frozen as described above. We collected ~1000 raw  
472 movie micrographs for each sample on an FEI Talos Arctica operated at 200 kV with a Falcon III direct  
473 electron detector. Data was collected semi-automatically with EPU at a nominal magnification of  
474  $\times 120,000$  and pixel size of 1.21 Å per pixel. The under-focus value ranged from 1.5 to 2.5  $\mu\text{m}$ . The dose  
475 rate was 20 eV per Å<sup>2</sup> per second and total exposure time was 3 s. The total dose was divided into a 39-  
476 frame movie so each frame was exposed for 0.07 s.

477

478 **Negative-staining EM of Pol  $\alpha$ -primase.** A sample of 2  $\mu\text{L}$  of yeast Pol  $\alpha$ -primase at 0.1 mg/mL in 20  
479 mM Tris-Acetate pH 7.5, 0.5 mM EDTA, 100 mM KGlutamate was applied to a glow-discharged carbon-  
480 coated copper grid for 30 s. Excess sample was blotted away using Whatman filter paper (Grade 1) with  
481 subsequent application of 2  $\mu\text{L}$  of a 2% (w/v) aqueous solution of uranyl acetate. The staining solution  
482 was left on the grid for 30 s before the excess was blotted away. The staining solution was applied for a  
483 second time, blotted away and left to dry for 15 min before EM. A total of 50 micrographs were  
484 collected on a 2k by 2k CCD camera in FEI Tecnai G2 Spirit BioTWIN TEM operated at 120 kV at a  
485 magnification of  $\times 30,000$ , corresponding to 2.14 Å per pixel at the sample level. Electron micrographs  
486 were processed using Relion 2 (Scheres, 2012). After CTF estimation and correction using Gctf (Zhang,  
487 2016), particles in each micrograph were automatically picked using a Gaussian blob as the template at a  
488 threshold of 0.1, leading to a dataset of 24,712 raw particles. 2D classification was run for 25 iterations  
489 with the class number assigned to 100, the particle mask diameter set to 256 Å, the regularization  
490 parameter T left at the default value of 2, and the maximum number of significant coarse weights  
491 restricted to 500.

492

493 For observing the CMG-Ctf4<sub>3</sub>-Pol  $\alpha$ -primase complex, a sample of 2  $\mu\text{L}$  of the ternary mixture at 0.12  
494 mg/ml was applied to a glow-discharged carbon-coated grid for 1 min, then a 2  $\mu\text{L}$  drop of 2% (w/v)  
495 aqueous solution of uranyl acetate was applied to the grid for an additional 1 min, then blotted away  
496 with a piece of filter paper, and the staining step was repeated one more time. The dried EM grid was  
497 loaded onto an 120 kV FEI Tecnai G2 Spirit EM with a 2K  $\times$  2K CCD camera. A total of 200  
498 micrographs were collected at a magnification of  $\times 30,000$ , corresponding to 2.14 Å per pixel. After CTF  
499 estimation and correction using CTFFIND4, particles were manually picked in Relion 2.1. About 9,000  
500 particles were picked for 2D classification. Several 2D averages showed a binary complex of CMG-  
501 Ctf4<sub>3</sub>, and the ternary complex of CMG-Ctf4<sub>3</sub> - Pol  $\alpha$ -primase complex.

502

503 **Image processing and 3D reconstruction.** The movie frames were first aligned and superimposed by  
504 the program Motioncorr 2.0 (Zheng et al., 2017). Contrast transfer function parameters of each aligned  
505 micrograph were calculated using the program CTFFIND4 (Rohou and Grigorieff, 2015). All the  
506 remaining steps, including particle auto selection, 2D classification, 3D classification, 3D refinement,  
507 and density map post-processing were performed using Relion-2.1 (Scheres, 2012). For the  
508 1CMG-Ctf4<sub>3</sub> sample, templates for automatic picking were generated from 2D averages calculated from  
509 about ~10,000 manually picked particles in different views. Automatic particle selection was then  
510 performed for the entire data set, and 759,267 particles were picked. Selected particles were carefully  
511 inspected; “bad” particles were removed, some initially missed “good” particles were re-picked, and the  
512 remaining good particles were sorted by similarity to the 2D references, in which the bottom 10% of  
513 particles with the lowest z-scores were removed from the particle pool. 2D classification of all good  
514 particles was performed and particles in the classes with unrecognizable features by visual inspection  
515 were removed. A total of 564,011 particles were then divided into two groups containing either a single  
516 CMG or two or three copies of CMG for further 3D classification. For 3D reconstruction of the various  
517 Ctf4<sub>3</sub>-CMG complexes, the low pass-filtered CMG-apo structure was used as the starting model, leading



518 to the first 3D map of the Ctf4<sub>3</sub>-(CMG)<sub>3</sub> complex. We then used Chimera to mask out either one or two  
519 CMG densities from the 3D map of Ctf4<sub>3</sub>-(CMG)<sub>3</sub> to generate a starting model for 1CMG-Ctf4<sub>3</sub> and  
520 2CMG-Ctf4<sub>3</sub> respectively. Four 3D models were derived from each group, and models that appeared  
521 similar were combined for final refinement. The models not chosen were distorted and those particles  
522 were discarded. The final three datasets that contain single CMG (Ctf4<sub>3</sub>-CMG<sub>1</sub>), two CMGs  
523 (Ctf4<sub>3</sub>-CMG<sub>2</sub>), and three CMGs (Ctf4<sub>3</sub>-CMG<sub>3</sub>) were used for final 3D refinement, resulting in three 3D  
524 density maps at 3.9 Å, 5.8 Å and 7.0 Å resolution, respectively. The resolution was estimated by the  
525 gold-standard Fourier shell correlation, at the correlation cutoff value of 0.143. The 3D density map was  
526 sharpened by applying a negative B-factor of -146, -135 and -143 Å<sup>2</sup>, respectively. Local resolution  
527 was estimated using ResMap. In the 1CMG-Ctf4<sub>3</sub> analysis, the density of the Mcm2-7 CTD motor  
528 region was weak and noisy. A mask was used to exclude the CTD ring, and the remaining region  
529 composed of Ctf4<sub>3</sub>-Cdc45-GINS-Mcm2-7 N-tier ring had an estimated resolution of 3.8 Å, based on  
530 the gold standard Fourier shell correlation curve.

531  
532 For the Ctf4<sub>3</sub>-Polα-primase dataset, ~5,000 particles in different views were manually picked to  
533 generate the templates. Automatic particle selection was then performed for the entire dataset, and  
534 237,688 particles were initially picked in Relion-2.1. Similar to the image process in Ctf4<sub>3</sub>-CMG, “bad”  
535 and structurally heterogeneous particles were removed by visual inspection. After 2D classification,  
536 142,806 particles in many different views were selected for further 3D classification. The selected  
537 particles were separated into 5 classes by the 3D classification procedure, using a low-pass filtered Ctf4  
538 trimer structure as the starting model. Two good classes were selected and combined for final 3D  
539 refinement. The final 3D refinement produced a 12-Å 3D density map. The resolution of the map was  
540 estimated by the gold-standard Fourier shell correlation, at the correlation cutoff value of 0.143. The 3D  
541 density map was sharpened by applying a negative B-factor of -162 Å<sup>2</sup>.

542  
543 For the Ctf4<sub>3</sub> dataset, we picked about 3,000 particles in different views to generate the templates.  
544 Automatic particle picking was performed for the entire dataset containing about 500 micrographs, and  
545 113,936 particles were picked in Relion-2.1; then 2D classification was performed to produce a set of  
546 well-defined 2D averages. 3D classification and 3D reconstruction were not performed because the  
547 crystal structure of Ctf4<sub>3</sub> is available and our purpose was only to obtain the cryo-EM 2D averages.

548  
549 **Atomic modeling, refinement, and validation.** The modeling of Ctf4<sub>3</sub>-CMG<sub>1</sub>, Ctf4<sub>3</sub>-CMG<sub>2</sub> and  
550 Ctf4<sub>3</sub>-CMG<sub>3</sub> was based on the structure of CMG (PDB 3JC5) and Ctf4<sub>3</sub> (PDB 4C8H). For  
551 Ctf4<sub>3</sub>-CMG<sub>1</sub>, one CMG and one Ctf4 trimer were directly docked as rigid bodies into the EM map using  
552 Chimera (Pettersen et al., 2004). The initial modeling was followed by further manual adjustments using  
553 COOT (Emsley et al., 2010), guided by residues with bulky side chains like Arg, Phe, Tyr and Trp. The  
554 improved model was then refined in real space against the EM densities using the  
555 phenix.real\_space\_refine module in PHENIX (Adams et al., 2010). For Ctf4<sub>3</sub>-CMG<sub>2</sub> and Ctf4<sub>3</sub>-CMG<sub>3</sub>,  
556 Chimera was used to rigid-body dock two or three copies of CMG and one Ctf4<sub>3</sub> into the corresponding  
557 EM map. Due to the low resolution of the latter two maps, the atomic models were not subject to further  
558 refinement. Finally, the quality of the refined atomic model of Ctf4<sub>3</sub>-CMG was examined using  
559 MolProbity (Chen et al., 2010). For modeling of the Ctf4<sub>3</sub>-Polα-primase 3D map, one Ctf4 trimer (PDB  
560 4C8H) and one Polα-primase catalytic NTD (PDB 4FYD) were docked as two separate rigid bodies into  
561 the 3D map in Chimera. Due to the low resolution of 3D map, the model was neither manually adjusted  
562 nor subjected to refinement. Structural figures were prepared in Chimera and Pymol  
563 (<https://www.pymol.org>).

564

565 **Glycerol gradient sedimentation.** To examine complex formation, 0.12 nmol of CMG was mixed with  
566 0.12 nmol Ctf4<sub>3</sub>, 0.12 nmol of Pol ε and 0.12 nmol Pol α-primase in 150 μl of 20 mM Tris-acetate (pH  
567 7.6), 1 mM DTT, 2 mM Mg-OAc, 100 mM NaCl (final) for 30 min at 16 °C, and the mixture was  
568 layered on top of an 11.2 mL 15–35% (vol/vol) glycerol gradient in 20 mM Tris-acetate (pH 7.6), 1 mM  
569 DTT, 2 mM magnesium acetate, 50 mM NaCl and spun at 4 °C for 16 h in a Sorvall 90SE  
570 ultracentrifuge using a T-865 rotor. Five drop fractions were collected from the bottom of the centrifuge  
571 tubes, and 20 μL samples were analyzed by SDS/PAGE stained with Coomassie Blue. Similar gradient  
572 analyses were performed for submixtures of the proteins. A parallel gradient was also performed using  
573 protein standards (BioRad 151–1901) in the same buffer. Gels were scanned and quantitated using  
574 Image J software and relative moles of protein in each band were calculated, taking into account their  
575 native mw. Only subunits the size of Cdc45 or larger were analyzed, as smaller subunit bands were too  
576 light for analysis. The full-length Ctf4<sub>3</sub> was used to enhance its staining capacity, as the small C-half of  
577 Ctf4<sub>3</sub> was not well distinguished above background. The full-length Ctf4<sub>3</sub> overlapped with Mcm4 and  
578 required taking the overlap into account (see legend to **Figure 7 – figure supplement 1**).

579  
580 **Pull-down assays.** Pull-down assays were performed by mixing 20 pmol of N-terminal labeled streptag-  
581 Ctf4 trimer with 60 pmol Pol α-primase (when present) and 60 pmol CMG (when present) at 25°C for  
582 10 min. Then the volume of the protein solution was adjusted to 50 μl with binding buffer (20 mM Tris-  
583 Acetate, pH 7.5, 1 mM DTT, 5% glycerol, 2 mM magnesium acetate, 50 mM KGlutamate and 50 mM  
584 KCl) before being mixed with 50 μl of a 50% suspension of StrepTactin magnetic beads (Qiagen). The  
585 protein-bead mixture was incubated in a Thermomixer at 1250 rpm, 4°C for 1 hr. The beads were then  
586 collected with a magnetic separator and the supernatant containing unbound proteins was removed. The  
587 beads were washed twice with 100 μl binding buffer and bound proteins were eluted by incubating the  
588 beads in 50 μl of the same buffer supplemented with 5 mM biotin at 25°C for 15 min. The eluted  
589 proteins were analyzed in an 8% SDS-polyacrylamide gel and scanned and quantitated using a Typhoon  
590 9400 laser imager (GE Healthcare).

591  
592 **Helicase assays:** DNA oligos used to form the forked substrate were “lagging helicase oligo”:  
593 (5’GGCAGGCAGGCAGGCAGGCAGGCAGGCAGGCAGGCAGGCAGGCTTGTCTAGCAAGCCAGAA  
594 TTCGGCAGC\*G\*T\*C) and “leading helicase oligo”:  
595 (5’GACGCTGCCGAATTCTGGCTTGCTAGGACATTTTTTTTTTTTTTTTTTTTTTTTTTTTTTTTTTTTTTTTT  
596 TTTT\*T\*T\*T). Asterisks denote thiodiester linkages. The leading helicase oligo was <sup>32</sup>P-5’ end-labeled  
597 and annealed to its respective lagging helicase oligo to form the forked DNA substrate. The forked DNA  
598 was isolated from a native PAGE. In the experiments of **Figure 7b**, 2CMG-Ctf4<sub>3</sub> complexes were  
599 formed by preincubating 276 nM CMG with 138 nM full length Ctf4<sub>3</sub> on ice for 15 min. and then 25°C  
600 for 10 min. CMG or CMG-Ctf4 complexes were added to reactions to give a final concentration of 24  
601 nM CMG, 0.5 nM forked DNA substrate, and 5mM ATP in a final buffer of 20 mM Tris-Acetate pH  
602 7.6, 5 mM DTT, 0.1 mM EDTA, 10 mM MgSO<sub>4</sub>, 30 mM KCl. Reactions were preincubated with 0.1  
603 mM ATP<sub>γ</sub>S (Roche) for 10 min at 30°C with DNA and either CMG or CMG-Ctf4 before initiating  
604 unwinding upon adding 5mM ATP. Reactions were quenched at the times indicated with 20 mM EDTA  
605 and 0.1% SDS (final concentrations), and analyzed on a 10% native PAGE in TBE buffer. The assays of  
606 **Figure 7 – figure supplement 3a** (i.e. that tested preincubation time with 0.1 μM ATP<sub>γ</sub>S) were  
607 performed as in **Figure 7b**, except reactions were preincubated for different times with ATP<sub>γ</sub>S at 30°C  
608 before initiating unwinding with 5mM ATP for 10 min. An aliquot from each preincubation reaction  
609 was removed and quenched (for analysis of unwinding during preincubation), and then 5 mM ATP was  
610 added to the remainder of the reaction for analysis of unwinding with ATP after the ATP<sub>γ</sub>S  
611 preincubation step. All reactions were quenched with 20 mM EDTA/0.1% SDS. Reactions of **Figure 7 –**  
612 **figure supplement 3b** utilized the amounts of Ctf4<sub>3</sub> indicated, preincubated with CMG as above to form

613 the CMG-Ctf4 complex, and DNA unwinding was initiated upon adding either 20 nM CMG, or 20 nM  
614 CMG-Ctf4 with 5 mM ATP for 30 min at 30°C. The assays included 50 nM unlabeled LEADING  
615 helicase oligo as a trap 2' after adding ATP. Gels were exposed to a phosphor screen then scanned and  
616 quantitated on a Typhoon 9400 laser imager (GE Healthcare).

617  
618 **Replication assays.** Leading strand replication experiments used a forked DNA substrate formed from  
619 the following oligonucleotides: Leading strand template 180mer:  
620 5'AGGTGTAGATTAATGTGGTTAGAATAGGGATGTGGTAGGAAGTGAGAATTGGAGAGTGT  
621 GTTTTTTTTTTTTTTTTTTTTTTTTTTTTTTTTTTTTTTTTTTTTTTTTTTAAAGGTGAGGGTTGGGAAGTGGA  
622 AGGATGGGCTCGAGAGGTTTTTTTTTTTTTTTTTTTTTTTTTTTTTTTTTTTTTTTTTTTT\*<sup>32</sup>P-T-3', and  
623 lagging strand template 100mer: 5'-  
624 GGCAGGCAGGCAGGCAGGCAGGCAGGCAGGCAGGCAGGCAGGCAGGCACACTCTCCAATT  
625 CTCACTTCCTACCACATCCCTATTCTAACCACATTAATCTACA\*C\*C\*T-3' Asterisks are  
626 thiodiester linkages. The fork was primed for leading strand DNA replication with 5'-<sup>32</sup>P-  
627 CCTCTCGAGCCCATCCTTCCACTTCCCAACCCTCACC-3'. The 2CMG-Ctf4<sub>3</sub> complexes were  
628 reconstituted by incubating 276 nM CMG with 138 nM Ctf4<sub>3</sub> on ice for 15 min. and then 25°C for 10  
629 min. When present, 276 nM Pol α-primase was also added to the reconstitution reaction to form  
630 complexes with an average stoichiometry of 2CMG-Ctf4<sub>3</sub>-Pol α-primase. For the reactions of **Figure**  
631 **7c**, reactions contained 20 nM CMG, 20 nM Pol α-primase, 10 nM Ctf4<sub>3</sub> (where indicated) and 0.5 nM  
632 <sup>32</sup>P-primed forked substrate (final concentrations) in a buffer consisting of 25 mM Tris-Acetate pH 7.5,  
633 5% glycerol, 2 mM DTT, 10 mM magnesium sulfate, 1 μM dTTP and preincubated with 100 μM  
634 ATPγS for 30 min. DNA synthesis was initiated upon adding 5 mM ATP and 100 μM each dNTP, and  
635 stopped at the indicated times using an equal volume of 1% SDS, 40 mM EDTA, 90% formamide. For  
636 the preincubation analysis of **Figure 7 – supplemental figure 4a** (top), the same procedure was  
637 followed as **Figure 7b**, except the preincubation time varied as indicated, and the replication time was 8  
638 min. Replication reactions in **Figure 7 – figure supplement 4b** were performed similarly except there  
639 was no preincubation step and the buffer included 10 μg/ml BSA, 50 mM K glutamate, 0.1 mM EDTA.  
640 Reaction products were analyzed on 10% PAGE gels containing 6M urea in TBE buffer, then exposed  
641 to a phosphorimager screen and imaged with a Typhoon FLA 9500 (GE Healthcare). Gel bands were  
642 quantitated with ImageQuant software.

643  
644 **Acknowledgement.** Cryo-EM data were collected at the David Van Andel Advanced Cryo-Electron  
645 Microscopy Suite at the Van Andel Research Institute. We thank X. Meng for help with data collection.  
646 This study was supported by the US National Institutes of Health R01 grants GM111742 and  
647 GM124170 (to H.L.), and GM115809 (to M.E.O), the Van Andel Research Institute (H.L.), and the  
648 Howard Hughes Medical Institute (M.E.O).

649  
650 **Accession codes.** The 3D cryo-EM maps of Ctf4<sub>3</sub>-CMG<sub>1</sub>, Ctf4<sub>3</sub>-CMG<sub>2</sub>, and Ctf4<sub>3</sub>-CMG<sub>3</sub> at 3.8-Å,  
651 5.8-Å and 7.0-Å resolution have been deposited in the Electron Microscopy Data Bank under accession  
652 codes EMD-20471, EMD-20472 and EMD-20473, respectively. The corresponding atomic models have  
653 been deposited in the Protein Data Bank under accession codes PDB 6PTJ, PDB 6PTN, PDB 6PTO,  
654 respectively.

655  
656 **REFERENCES**  
657  
658 Abe T, Kawasumi R, Giannattasio M, Dusi S, Yoshimoto Y, Miyata K, Umemura K, Hirota K, Branzei  
659 D. 2018. AND-1 fork protection function prevents fork resection and is essential for proliferation. *Nat*  
660 *Commun* 9:3091. DOI: <https://doi.org/10.1038/s41467-018-05586-7>, PMID: 30082684

- 661  
662 Abid Ali F, Renault L, Gannon J, Gahlon HL, Kotecha A, Zhou JC, Rueda D, Costa A. 2016. Cryo-EM  
663 structures of the eukaryotic replicative helicase bound to a translocation substrate. *Nat Commun*  
664 **7**:10708. DOI: <https://doi.org/10.1038/ncomms10708>, PMID: 26888060  
665
- 666 Adams PD, Afonine PV, Bunkoczi G, Chen VB, Davis IW, Echols N, Headd JJ, Hung LW, Kapral GJ,  
667 Grosse-Kunstleve RW, McCoy AJ, Moriarty NW, Oeffner R, Read RJ, Richardson DC, Richardson JS,  
668 Terwilliger TC, Zwart PH. 2010. PHENIX: a comprehensive Python-based system for macromolecular  
669 structure solution. *Acta Crystallogr D Biol Crystallogr* **66**:213-221. DOI:  
670 <https://doi.org/10.1107/S09074444909052925>, PMID: 20124702
- 671 Alabert C, Jasencakova Z, Groth A. 2017. Chromatin Replication and Histone Dynamics. *Adv Exp Med*  
672 *Biol.* **1042**:311-333. doi: 10.1007/978-981-10-6955-0\_15. doi: 10.1007/978-981-10-6955-0\_15. PMID:  
673 29357065.
- 674 Baranovskiy AG, Tahirov TH. 2017. Elaborated Action of the Human Primosome. *Genes (Basel)* **8**.  
675 DOI: <https://doi.org/10.3390/genes8020062>, PMID: 28208743  
676
- 677 Bell SP, Labib K. 2016. Chromosome Duplication in *Saccharomyces cerevisiae*. *Genetics* **203**:1027-  
678 1067. DOI: <https://doi.org/10.1534/genetics.115.186452>, PMID: 27384026  
679
- 680 Bellelli R, Belan O, Pye VE, Clement C, Maslen SL, Skehel JM, Cherepanov P, Almouzni  
681 G, BoultonSJ. (2018) POLE3-POLE4 Is a Histone H3-H4 Chaperone that Maintains Chromatin Integrity  
682 during DNA Replication. *Mol Cell.* **72**:112-126. e5. doi: 10.1016/j.molcel.2018.08.043. Epub 2018 Sep  
683 11. PMID: 30189141.
- 684
- 685 Burgers PMJ, Kunkel TA. 2017. Eukaryotic DNA Replication Fork. *Annu Rev Biochem* **86**:417-438.  
686 DOI: <https://doi.org/10.1146/annurev-biochem-061516-044709>, PMID: 28301743  
687
- 688 Burnham DR, Kose HB, Hoyle RB, Yardimci H. (2019) The mechanism of DNA unwinding by the  
689 eukaryotic replicative helicase. *Nat Commun.* **10**:2159. doi: 10.1038/s41467-019-09896-2. PMID  
690 30189141.  
691
- 692 Chagin VO, Casas-Delucchi CS, Reinhart M, Schermelleh L, Markaki Y, Maiser A, Bolius JJ,  
693 Bensimon A, Fillies M, Domaing P, Rozanov YM, Leonhardt H, Cardoso MC. 2016. 4D Visualization  
694 of replication foci in mammalian cells corresponding to individual replicons. *Nat Commun* **7**:11231.  
695 DOI: <https://doi.org/10.1038/ncomms11231>, PMID: 27052570  
696
- 697 Chen VB, Arendall WB, 3rd, Headd JJ, Keedy DA, Immormino RM, Kapral GJ, Murray LW,  
698 Richardson JS, Richardson DC. 2010. MolProbity: all-atom structure validation for macromolecular  
699 crystallography. *Acta Crystallogr D Biol Crystallogr* **66**:12-21. DOI:  
700 <https://doi.org/10.1107/S09074444909042073>, PMID: 20057044  
701
- 702 Conti C, Sacca B, Herrick J, Lalou C, Pommier Y, Bensimon A. 2007. Replication fork velocities at  
703 adjacent replication origins are coordinately modified during DNA replication in human cells. *Mol Biol*  
704 *Cell* **18**:3059-3067. DOI: <https://doi.org/10.1091/mbc.e06-08-0689>, PMID: 17522385  
705



- 706 Costa A, Ilves I, Tamberg N, Petojevic T, Nogales E, Botchan MR, Berger JM. (2011) The structural  
707 basis for MCM2-7 helicase activation by GINS and Cdc45. *Nat Struct Mol Biol.* **18**:471-7. doi:  
708 10.1038/nsmb.2004. Epub 2011 Mar 6. PMID: 21378962  
709
- 710 Douglas ME, Ali FA, Costa A, Diffley JFX. (2018) The mechanism of eukaryotic CMG helicase  
711 activation. *Nature.* **555**:265-268. doi: 10.1038/nature25787. Epub 2018 Feb 28. PMID:29489749  
712
- 713 Duzdevich D, Warner MD, Ticau S, Ivica NA, Bell SP, Greene EC. 2015. The dynamics of eukaryotic  
714 replication initiation: origin specificity, licensing, and firing at the single-molecule level. *Mol Cell*  
715 **58**:483-494. DOI: <https://doi.org/10.1016/j.molcel.2015.03.017>, PMID: 25921072  
716
- 717 Emsley P, Lohkamp B, Scott WG, Cowtan K. 2010. Features and development of Coot. *Acta*  
718 *Crystallogr D Biol Crystallogr* **66**:486-501. DOI: <https://doi.org/10.1107/S0907444910007493>, PMID:  
719 20383002.  
720
- 721 Evrin, C., Maman, J.D., Diamante, A., Pellegrini, L., and Labib, K. (2018) Histone H2A-H2B binding  
722 by Pol  $\alpha$  in the eukaryotic replisome contributes to the maintenance of repressive chromatin. *EMBO J.*  
723 **37**: e99021, doi: 10.15252/embj.201899021. Epub 2018 Aug 13 PMID:30104407, PMCID:  
724 PMC6166128.  
725
- 726 Falaschi A. 2000. Eukaryotic DNA replication: a model for a fixed double replisome. *Trends Genet*  
727 **16**:88-92. DOI: [https://doi.org/10.1016/S0168-9525\(99\)01917-4](https://doi.org/10.1016/S0168-9525(99)01917-4), PMID: 10652536  
728
- 729 Fu YV, Yardimci H, Long DT, Ho TV, Guainazzi A, Bermudez VP, Hurwitz J, van Oijen A, Scharer  
730 OD, Walter JC. 2011. Selective bypass of a lagging strand roadblock by the eukaryotic replicative DNA  
731 helicase. *Cell* **146**:931-941. DOI: <https://doi.org/10.1016/j.cell.2011.07.045>, PMID: 21925316  
732
- 733 Gambus A, Jones RC, Sanchez-Diaz A, Kanemaki M, van Deursen F, Edmondson RD, Labib K. 2006.  
734 GINS maintains association of Cdc45 with MCM in replisome progression complexes at eukaryotic  
735 DNA replication forks. *Nat Cell Biol* **8**:358-366. DOI: <https://doi.org/10.1038/ncb1382>, PMID:  
736 16531994  
737
- 738 Gambus A, van Deursen F, Polychronopoulos D, Foltman M, Jones RC, Edmondson RD, Calzada A,  
739 Labib K. 2009. A key role for Ctf4 in coupling the MCM2-7 helicase to DNA polymerase alpha within  
740 the eukaryotic replisome. *EMBO J* **28**:2992-3004. DOI: <https://doi.org/10.1038/emboj.2009.226>, PMID:  
741 19661920  
742
- 743 Gan H, Serra-Cardona A, Hua X, Zhou H, Labib K, Yu C, Zhang Z. (2018) The Mcm2-Ctf4-Pol $\alpha$  Axis  
744 Facilitates Parental Histone H3-H4 Transfer to Lagging Strands. *Mol Cell.* **72**:140-151. doi:  
745 10.1016/j.molcel.2018.09.001. Epub 2018 Sep 20 PMID:30244834  
746
- 747 Georgescu R, Langston L, O'Donnell M. 2015a. A proposal: Evolution of PCNA's role as a marker of  
748 newly replicated DNA. *DNA Repair (Amst)* **29**:4-15. DOI: <https://doi.org/10.1016/j.dnarep.2015.01.015>,  
749 PMID: 25704660  
750
- 751 Georgescu R, Yuan Z, Bai L, de Luna Almeida Santos R, Sun J, Zhang D, Yurieva O, Li H, O'Donnell  
752 ME. 2017. Structure of eukaryotic CMG helicase at a replication fork and implications to replisome  
753 architecture and origin initiation. *PNAS* **114**:E697-E706. DOI: <https://doi.org/10.1073/pnas.1620500114>,  
754 PMID: 28096349

755  
756 Georgescu RE, Langston L, Yao NY, Yurieva O, Zhang D, Finkelstein J, Agarwal T, O'Donnell ME.  
757 2014. Mechanism of asymmetric polymerase assembly at the eukaryotic replication fork. *Nat Struct Mol*  
758 *Biol* **21**:664-670. DOI: <https://doi.org/10.1038/nsmb.2851>, PMID: 24997598  
759  
760 Georgescu RE, Schauer GD, Yao NY, Langston LD, Yurieva O, Zhang D, Finkelstein J, O'Donnell ME.  
761 2015b. Reconstitution of a eukaryotic replisome reveals suppression mechanisms that define  
762 leading/lagging strand operation. *Elife* **4**:e04988. DOI: <https://doi.org/10.7554/eLife.04988>, PMID:  
763 25871847  
764  
765 Gillespie PJ, Blow JJ. 2010. Clusters, factories and domains: The complex structure of S-phase comes  
766 into focus. *Cell Cycle* **9**:3218-3226. DOI: <https://doi.org/10.7554/eLife.04988>, PMID: 25871847  
767  
768 Goren A, Cedar H. 2003. Replicating by the clock. *Nat Rev Mol Cell Biol* **4**:25-32. DOI:  
769 <https://doi.org/10.1038/nrm1008>, PMID: 12511866  
770  
771 Goswami P, Abid Ali F, Douglas ME, Locke J, Purkiss A, Janska A, Eickhoff P, Early A, Nans A,  
772 Cheung AMC, Diffley JFX, Costa A. (2018) Structure of DNA-CMG-Pol epsilon elucidates the roles of  
773 the non-catalytic polymerase modules in the eukaryotic replisome. *Nat Commun.* **9**:5061. doi:  
774 [10.1038/s41467-018-07417-1](https://doi.org/10.1038/s41467-018-07417-1). PMID: 30498216  
775  
776 He, H., Li, Y., Dong, Q., Chang, A.Y., Gao, F., Chi, Z., Su, M., Zhang, F., Ban, H., Martienssen, R.,  
777 Chen, Y.H., and Li, F. (2017). Coordinated regulation of heterochromatin inheritance by Dpb3-Dpb4  
778 complex. *Proc Natl Acad Sci U S A* **114**, 12524-12529. doi: [10.1073/pnas.1712961114](https://doi.org/10.1073/pnas.1712961114). Epub 2017 Nov  
779 6. PMID:29109278, PMCID: [PMC5703312](https://pubmed.ncbi.nlm.nih.gov/29109278/).  
780  
781 Iida T, Araki H (2004) Noncompetitive counteractions of DNA polymerase epsilon and ISW2/yCHRAC  
782 for epigenetic inheritance of telomere position effect in *Saccharomyces cerevisiae*. *Mol Cell Biol* **24**:  
783 217 – 227. DOI:[10.1128/mcb.24.1.217-227.2004](https://doi.org/10.1128/mcb.24.1.217-227.2004). PMID:14673157; PMCID: PMC303358.  
784  
785 Huang, H., Strømme, C.B., Saredi, G., Hořdl, M., Strandsby, A., González-Aguilera, C., Chen, S.,  
786 Groth, A., and Patel, D.J. (2015). A unique binding mode enables MCM2 to chaperone histones H3-H4  
787 at replication forks. *Nat. Struct. Mol. Biol.* **22**, 618–626. doi: [10.1038/nsmb.3055](https://doi.org/10.1038/nsmb.3055). Epub 2015 Jul 13.  
788 PMID:26167883.  
789  
790 Ilves I, Petojevic T, Pesavento JJ, Botchan MR. 2010. Activation of the MCM2-7 helicase by  
791 association with Cdc45 and GINS proteins. *Mol Cell* **37**:247-258. DOI:  
792 <https://doi.org/10.1016/j.molcel.2009.12.030>, PMID: 20122406  
793  
794 Indiani C, Langston LD, Yurieva O, Goodman MF, O'Donnell M. 2009. Translesion DNA polymerases  
795 remodel the replisome and alter the speed of the replicative helicase. *PNAS* **106**:6031-6038. DOI:  
796 <https://doi.org/10.1073/pnas.0901403106>, PMID: 19279203  
797  
798 Kang YH, Farina A, Bermudez VP, Tappin I, Du F, Galal WC, Hurwitz J. 2013. Interaction between  
799 human Ctf4 and the Cdc45/Mcm2-7/GINS (CMG) replicative helicase. *PNAS* **110**:19760-19765. DOI:  
800 <https://doi.org/10.1073/pnas.1320202110>, PMID: 24255107  
801

- 802 Kilkenny ML, Simon AC, Mainwaring J, Wirthensohn D, Holzer S, Pellegrini L. 2017. The human  
803 CTF4-orthologue AND-1 interacts with DNA polymerase alpha/primase via its unique C-terminal HMG  
804 box. *Open Biol* **7**:10. DOI: <https://doi.org/10.1098/rsob.170217>, PMID: 29167311  
805
- 806 Kitamura E, Blow JJ, Tanaka TU. 2006. Live-cell imaging reveals replication of individual replicons in  
807 eukaryotic replication factories. *Cell* **125**:1297-1308. DOI: <https://doi.org/10.1016/j.cell.2006.04.041>,  
808 PMID: 16814716  
809
- 810 Kose HB, Larsen NB, Duxin JP, Yardimci H. 2019. Dynamics of the Eukaryotic Replicative Helicase at  
811 Lagging-Strand Protein Barriers Support the Steric Exclusion Model. *Cell Rep*. **26**:2113-2125. doi:  
812 [10.1016/j.celrep.2019.01.086](https://doi.org/10.1016/j.celrep.2019.01.086). PMID 30784593.
- 813 Kurat CF, Yeeles JTP, Patel H, Early A, Diffley JFX. 2017. Chromatin Controls DNA Replication  
814 Origin Selection, Lagging-Strand Synthesis, and Replication Fork Rates. *Mol Cell*. **65**:117-130. doi:  
815 [10.1016/j.molcel.11.016](https://doi.org/10.1016/j.molcel.11.016). Epub 2016 Dec 15. PMID: 27989438.
- 816 Langston L, O'Donnell M. 2017a. Action of CMG with strand-specific DNA blocks supports an internal  
817 unwinding mode for the eukaryotic replicative helicase. *Elife* **6**:e23449. DOI:  
818 <https://doi.org/10.7554/eLife.23449>, PMID: 28346143  
819
- 820 Langston LD, Mayle R, Schauer GD, Yurieva O, Zhang D, Yao NY, Georgescu RE, O'Donnell ME.  
821 (2017b) Mcm10 promotes rapid isomerization of CMG-DNA for replisome bypass of lagging strand  
822 DNA blocks. *Elife*. **6**: e29118. doi: [10.7554/eLife.29118](https://doi.org/10.7554/eLife.29118). PMID: 28869037.  
823
- 824 Langston LD, Zhang D, Yurieva O, Georgescu RE, Finkelstein J, Yao NY, Indiani C, O'Donnell ME.  
825 2014. CMG helicase and DNA polymerase epsilon form a functional 15-subunit holoenzyme for  
826 eukaryotic leading-strand DNA replication. *PNAS* **111**:15390-15395. DOI:  
827 <https://doi.org/10.1073/pnas.1418334111>, PMID: 25313033  
828
- 829 Lewis JS, Spenkeliink LM, Jergic S, Wood EA, Monachino E, Horan NP, Duderstadt KE, Cox MM,  
830 Robinson A, Dixon NE, van Oijen AM. 2017. Single-molecule visualization of fast polymerase  
831 turnover in the bacterial replisome. *Elife*. **6**. pii: e23932. doi: [10.7554/eLife.23932](https://doi.org/10.7554/eLife.23932). PMID: 28432790  
832
- 833 Li H, O'Donnell ME. 2018. The Eukaryotic CMG Helicase at the Replication Fork: Emerging  
834 Architecture Reveals an Unexpected Mechanism. *Bioessays* **40**. DOI:  
835 <https://doi.org/10.1002/bies.201700208>, PMID: 29405332  
836
- 837 Ligasova A, Raska I, Koberna K. 2009. Organization of human replicon: singles or zipping couples? *J*  
838 *Struct Biol* **165**:204-213. DOI: <https://doi.org/10.1016/j.jsb.2008.11.004>, PMID: 19063972  
839
- 840 Madamba E.V., Berthet E.B., Francis N.J. 2017. Inheritance of Histones H3 and H4 during DNA  
841 Replication In Vitro. *Cell Rep*. **21**:1361-1374. doi: [10.1016/j.celrep.2017.10.033](https://doi.org/10.1016/j.celrep.2017.10.033). PMID: 29091772.  
842
- 843 Mangiameli SM, Cass JA, Merrikh H, Wiggins PA. 2018. The bacterial replisome has factory-like  
844 localization. *Curr Genet*. **64**(5):1029-1036. DOI: [10.1007/s00294-018-0830-z](https://doi.org/10.1007/s00294-018-0830-z). Epub 2018 Apr 9. PMID:  
845 29632994.  
846

- 847 Mangiameli SM, Veit BT, Merrikh H, Wiggins PA. 2017. The Replisomes Remain Spatially Proximal  
848 throughout the Cell Cycle in Bacteria. *PLoS Genet.* **13**(1):e1006582. DOI:  
849 10.1371/journal.pgen.1006582. eCollection 2017 Jan. PMID: 2811437.  
850
- 851 Miles J, Formosa T. 1992. Evidence that POB1, a *Saccharomyces cerevisiae* protein that binds to DNA  
852 polymerase alpha, acts in DNA metabolism in vivo. *Mol Cell Biol* **12**:5724-5735. DOI:  
853 <https://doi.org/10.1128/MCB.12.12.5724>, PMID: 1448101  
854
- 855 Moyer SE, Lewis PW, Botchan MR. 2006. Isolation of the Cdc45/Mcm2-7/GINS (CMG) complex, a  
856 candidate for the eukaryotic DNA replication fork helicase. *PNAS* **103**:10236-10241. DOI:  
857 <https://doi.org/10.1073/pnas.0602400103>, PMID: 16798881.  
858
- 859 Natsume T, Tanaka TU. 2010. Spatial regulation and organization of DNA replication within the  
860 nucleus. *Chromosome Res* **18**:7-17. DOI: <https://doi.org/10.1007/s10577-009-9088-0>, PMID: 19856119  
861
- 862 Nunez-Ramirez R, Klinge S, Sauguet L, Melero R, Recuero-Checa MA, Kilkenny M, Perera RL,  
863 Garcia-Alvarez B, Hall RJ, Nogales E, Pellegrini L, Llorca O. 2011. Flexible tethering of primase and  
864 DNA Pol alpha in the eukaryotic primosome. *Nucleic Acids Res* **39**:8187-8199. DOI:  
865 <https://doi.org/10.1093/nar/gkr534>, PMID: 21715379  
866
- 867 O'Donnell M, Langston L, Stillman B. 2013. Principles and concepts of DNA replication in bacteria,  
868 archaea, and eukarya. *Cold Spring Harb Perspect Biol* **5**:a010108. DOI:  
869 <https://doi.org/10.1101/cshperspect.a010108>, PMID: 23818497  
870
- 871 O'Donnell ME, Li H. 2018. The ring-shaped hexameric helicases that function at DNA replication forks.  
872 *Nat Struct Mol Biol* **25**:122-130. DOI: <https://doi.org/10.1038/s41594-018-0024-x>, PMID: 29379175  
873
- 874 Perera RL, Torella R, Klinge S, Kilkenny ML, Maman JD, Pellegrini L. 2013. Mechanism for priming  
875 DNA synthesis by yeast DNA Polymerase alpha. *Elife* **2**:e00482. DOI:  
876 <https://doi.org/10.7554/eLife.00482>, PMID: 23599895  
877
- 878 Pettersen EF, Goddard TD, Huang CC, Couch GS, Greenblatt DM, Meng EC, Ferrin TE. 2004. UCSF  
879 Chimera--a visualization system for exploratory research and analysis. *J Comput Chem* **25**:1605-1612.  
880 DOI: <https://doi.org/10.1002/jcc.20084>, PMID: 15264254  
881
- 882 Petryk, N., Dalby, M., Wenger, A., Stromme, C.B., Strandsby, A., Andersson, R., and Groth, A. (2018).  
883 MCM2 promotes symmetric inheritance of modified histones during DNA replication. *Science* **361**,  
884 1389-1392. doi: 10.1126/science.aau0294. Epub 2018 Aug 16. PMID:30115746.  
885
- 886 Pope BD, Hiratani I, Gilbert DM. 2010. Domain-wide regulation of DNA replication timing during  
887 mammalian development. *Chromosome Res* **18**:127-136. DOI: <https://doi.org/10.1007/s10577-009-9100-8>, PMID: 20013151  
888
- 889 Richet, N., Liu, D., Legrand, P., Velours, C., Corpet, A., Gaubert, A., Bakail, M., Moal-Raisin, G.,  
890 Guerois, R., Compper, C., et al. (2015). Structural insight into how the human helicase subunit MCM2  
891 may act as a histone chaperone together with ASF1 at the replication fork. *Nucleic Acids Res.* **43**, 1905–  
892 1917. doi: 10.1093/nar/gkv021. Epub 2015 Jan 23, PMID:25618846, PMCID: PMC4330383.  
893



- 894 Rohou A, Grigorieff N. 2015. CTFFIND4: Fast and accurate defocus estimation from electron  
895 micrographs. *J Struct Biol* **192**:216-221. DOI: <https://doi.org/10.1016/j.jsb.2015.08.008>, PMID:  
896 26278980  
897
- 898 Samora CP, Saksouk J, Goswami P, Wade BO, Singleton MR, Bates PA, Lengronne A, Costa A,  
899 Uhlmann F. 2016. Ctf4 Links DNA Replication with Sister Chromatid Cohesion Establishment by  
900 Recruiting the Chl1 Helicase to the Replisome. *Mol Cell* **63**:371-384. DOI:  
901 <https://doi.org/10.1016/j.molcel.2016.05.036>, PMID: 27397686  
902
- 903 Saner N, Karschau J, Natsume T, Gierlinski M, Retkute R, Hawkins M, Nieduszynski CA, Blow JJ, de  
904 Moura AP, Tanaka TU. 2013. Stochastic association of neighboring replicons creates replication  
905 factories in budding yeast. *J Cell Biol* **202**:1001-1012. DOI: <https://doi.org/10.1083/jcb.201306143>,  
906 PMID: 24062338  
907
- 908 Scheres SH. 2012. RELION: implementation of a Bayesian approach to cryo-EM structure  
909 determination. *J Struct Biol* **180**:519-530. DOI: <https://doi.org/10.1016/j.jsb.2012.09.006>, PMID:  
910 23000701  
911
- 912 Simon AC, Zhou JC, Perera RL, van Deursen F, Evrin C, Ivanova ME, Kilkenny ML, Renault L, Kjaer  
913 S, Matak-Vinkovic D, Labib K, Costa A, Pellegrini L. 2014. A Ctf4 trimer couples the CMG helicase to  
914 DNA polymerase alpha in the eukaryotic replisome. *Nature* **510**:293-297. DOI:  
915 <https://doi.org/10.1038/nature13234>, PMID: 24805245  
916
- 917 Sun J, Shi Y, Georgescu RE, Yuan Z, Chait BT, Li H, O'Donnell ME. 2015. The architecture of a  
918 eukaryotic replisome. *Nat Struct Mol Biol* **22**:976-982. DOI: <https://doi.org/10.1038/nsmb.3113>, PMID:  
919 26524492  
920
- 921 Tanaka H, Katou Y, Yagura M, Saitoh K, Itoh T, Araki H, Bando M, Shirahige K. 2009a. Ctf4  
922 coordinates the progression of helicase and DNA polymerase alpha. *Genes Cells* **14**:807-820. DOI:  
923 <https://doi.org/10.1111/j.1365-2443.2009.01310.x>, PMID: 19496828  
924
- 925 Tanaka H, Kubota Y, Tsujimura T, Kumano M, Masai H, Takisawa H. 2009b. Replisome progression  
926 complex links DNA replication to sister chromatid cohesion in *Xenopus* egg extracts. *Genes Cells*  
927 **14**:949-963. DOI: <https://doi.org/10.1111/j.1365-2443.2009.01322.x>, PMID: 19622120  
928
- 929 Villa F, Simon AC, Ortiz Bazan MA, Kilkenny ML, Wirthensohn D, Wightman M, Matak-Vinkovic D,  
930 Pellegrini L, Labib K. 2016. Ctf4 Is a Hub in the Eukaryotic Replisome that Links Multiple CIP-Box  
931 Proteins to the CMG Helicase. *Mol Cell* **63**:385-396. DOI: <https://doi.org/10.1016/j.molcel.2016.06.009>,  
932 PMID: 27397685  
933
- 934 Williams DR, McIntosh JR. 2002. mcl1+, the *Schizosaccharomyces pombe* homologue of CTF4, is  
935 important for chromosome replication, cohesion, and segregation. *Eukaryot Cell* **1**:758-773. DOI:  
936 <https://doi.org/10.1128/EC.1.5.758-773.2002>, PMID: 12455694  
937
- 938 Xu M, Long C, Chen X, Huang C, Chen S, Zhu B. (2010) Partitioning of histone H3–H4 tetramers  
939 during DNA replication-dependent chromatin assembly. *Science*. **328**:94–98. DOI:  
940 [10.1126/science.1178994](https://doi.org/10.1126/science.1178994) PubMed: 20360108  
941

- 942 Yardimci H, Loveland AB, Habuchi S, van Oijen AM, Walter JC. 2010. Uncoupling of sister replisomes  
943 during eukaryotic DNA replication. *Mol Cell* **40**:834-840. DOI:  
944 <https://doi.org/10.1016/j.molcel.2010.11.027>, PMID: 21145490  
945
- 946 Yeeles JT, Deegan TD, Janska A, Early A, Diffley JF. (2015) Regulated eukaryotic DNA replication  
947 origin firing with purified proteins. *Nature*. **519**:431-5. doi: 10.1038/nature14285. Epub 2015 Mar 4,  
948 PMID 25739503.  
949
- 950 Yeeles JT, Janska A, Early A, Diffley JF. 2017. How the Eukaryotic Replisome Achieves Rapid and  
951 Efficient DNA Replication. *Mol Cell* **65**:105-116. DOI: <https://doi.org/10.1016/j.molcel.2016.11.017>,  
952 PMID: 27989442  
953
- 954 Yoshizawa-Sugata N, Masai H. 2009. Roles of human AND-1 in chromosome transactions in S phase. *J*  
955 *Biol Chem* **284**:20718-20728. DOI: <https://doi.org/10.1074/jbc.M806711200>, PMID: 19439411  
956
- 957 You Z, De Falco M, Kamada K, Pisani FM, Masai H. 2013. The mini-chromosome maintenance (Mcm)  
958 complexes interact with DNA polymerase alpha-primase and stimulate its ability to synthesize RNA  
959 primers. *PLoS One* **8**:e72408. DOI: <https://doi.org/10.1371/journal.pone.0072408>, PMID: 23977294.  
960
- 961 Yuan Z, Bai L, Sun J, Georgescu R, Liu J, O'Donnell ME, Li H. 2016. Structure of the eukaryotic  
962 replicative CMG helicase suggests a pumpjack motion for translocation. *Nat Struct Mol Biol* **23**:217-  
963 224. DOI: <https://doi.org/10.1038/nsmb.3170>, PMID: 26854665  
964
- 965 Zhang K. 2016. Gctf: Real-time CTF determination and correction. *J Struct Biol* **193**:1-12. DOI:  
966 <https://doi.org/10.1016/j.jsb.2015.11.003>, PMID: 26592709  
967
- 968 Zheng SQ, Palovcak E, Armache JP, Verba KA, Cheng Y, Agard DA. 2017. MotionCor2: anisotropic  
969 correction of beam-induced motion for improved cryo-electron microscopy. *Nat Methods* **14**:331-332.  
970 DOI: <https://doi.org/10.1038/nmeth.4193>, PMID: 28250466  
971
- 972 Zhou Y, Wang TS. 2004. A coordinated temporal interplay of nucleosome reorganization factor, sister  
973 chromatin cohesion factor, and DNA polymerase alpha facilitates DNA replication. *Mol Cell Biol*  
974 **24**:9568-9579. DOI: <https://doi.org/10.1128/MCB.24.21.9568-9579.2004>, PMID: 15485923  
975
- 976 Zink D. 2006. The temporal program of DNA replication: new insights into old questions. *Chromosoma*  
977 **115**:273-287. DOI: <https://doi.org/10.1007/s00412-006-0062-8>, PMID: 16552593  
978

979 **Tables**

980

981 **Table1. Cryo-EM 3D reconstruction and refinement of the three Ctf4<sub>3</sub>–CMG complexes.**

|                                                 | <b>Ctf4<sub>3</sub>–CMG<sub>1</sub></b><br>(EMD-20471)<br>(PDB 6PTJ) | <b>Ctf4<sub>3</sub>–CMG<sub>2</sub></b><br>(EMD-20472)<br>(PDB 6PTN) | <b>Ctf4<sub>3</sub>–CMG<sub>3</sub></b><br>(EMD-20473)<br>(PDB 6PTO) |
|-------------------------------------------------|----------------------------------------------------------------------|----------------------------------------------------------------------|----------------------------------------------------------------------|
| <b>Data collection and processing</b>           |                                                                      |                                                                      |                                                                      |
| Magnification                                   | 130,000                                                              | 130,000                                                              | 130,000                                                              |
| Voltage (kV)                                    | 300                                                                  | 300                                                                  | 300                                                                  |
| Electron dose (e <sup>-</sup> /Å <sup>2</sup> ) | 50                                                                   | 50                                                                   | 50                                                                   |
| Under-focus range (μm)                          | 1.5 – 2.5                                                            | 1.5 – 2.5                                                            | 1.5 – 2.5                                                            |
| Pixel size (Å)                                  | 1.074                                                                | 1.074                                                                | 1.074                                                                |
| Symmetry imposed                                | C1                                                                   | C1                                                                   | C1                                                                   |
| Initial particle images (no.)                   | 759,267                                                              | 759,267                                                              | 759,267                                                              |
| Final particle images (no.)                     | 200,491                                                              | 53,853                                                               | 53,117                                                               |
| Map resolution (Å)                              | 3.8                                                                  | 5.8                                                                  | 7.0                                                                  |
| FSC threshold                                   | 0.143                                                                | 0.143                                                                | 0.143                                                                |
| Map resolution range (Å)                        | 3.5 – 5.0                                                            | 5.0 – 8.0                                                            | 5.0 – 8.0                                                            |
| <b>Refinement</b>                               |                                                                      |                                                                      |                                                                      |
| Initial model used (PDB code)                   | 3jc5, 4c8h                                                           | 3jc5, 4c8h                                                           | 3jc5, 4c8h                                                           |
| Map sharpening B factor (Å <sup>2</sup> )       | -146                                                                 | -135                                                                 | -143                                                                 |
| Model composition                               |                                                                      |                                                                      |                                                                      |
| Non-hydrogen atoms                              | 34,366                                                               | 90,831                                                               | 131,141                                                              |
| Protein and DNA residues                        | 41,92                                                                | 11,221                                                               | 15,710                                                               |
| Ligands                                         | 0                                                                    | 0                                                                    | 0                                                                    |
| R.m.s. deviations                               |                                                                      |                                                                      |                                                                      |
| Bond lengths (Å)                                | 0.009                                                                |                                                                      |                                                                      |
| Bond angles (°)                                 | 1.46                                                                 |                                                                      |                                                                      |
| Validation                                      |                                                                      |                                                                      |                                                                      |
| MolProbity score                                | 2.05                                                                 |                                                                      |                                                                      |
| Clashscore                                      | 10.96                                                                |                                                                      |                                                                      |
| Poor rotamers (%)                               | 0.63                                                                 |                                                                      |                                                                      |
| Ramachandran plot                               |                                                                      |                                                                      |                                                                      |
| Favored (%)                                     | 91.65                                                                |                                                                      |                                                                      |
| Allowed (%)                                     | 8.16                                                                 |                                                                      |                                                                      |
| Disallowed (%)                                  | 0.19                                                                 |                                                                      |                                                                      |

982

983

984 **Table 2. Cryo-EM 3D reconstruction of the Ctf4<sub>3</sub>–Pol  $\alpha$ -primase complex.**

985  
986

|                                                 | <b>Ctf4<sub>3</sub>–Pol<math>\alpha</math>-primase</b><br>(EMD-XXXX) |
|-------------------------------------------------|----------------------------------------------------------------------|
| <b>Data collection and processing</b>           |                                                                      |
| Magnification                                   | 120,000                                                              |
| Voltage (kV)                                    | 200                                                                  |
| Electron dose (e <sup>-</sup> /Å <sup>2</sup> ) | 60                                                                   |
| Under-focus range ( $\mu$ m)                    | 1.5 – 2.5                                                            |
| Pixel size (Å)                                  | 1.21                                                                 |
| Symmetry imposed                                | C1                                                                   |
| Initial particle images (no.)                   | 237,688                                                              |
| Final particle images (no.)                     | 48,414                                                               |
| Map resolution (Å)                              | 12                                                                   |
| FSC threshold                                   | 0.143                                                                |
| Map resolution range (Å)                        | 10 – 15                                                              |

987  
988  
989

990 **Video 1.** A 360° rotation around a vertical axis of the 3D density map of 1CMG-Ctf4<sub>3</sub> at 3.8 Å  
991 resolution, followed by the subunit-segmented map, and the cartoon view of the atomic model. The map  
992 and model do not include the C-tier AAA+ motor ring of the Mcm2-7, which was excluded during 3D  
993 refinement.

994

995 **Video 2.** A 360° rotation of the 3D density map of 2CMG-Ctf4<sub>3</sub>, at 5.8 Å resolution, followed by  
996 density segmentation, and then the atomic model of 2CMG-Ctf4<sub>3</sub>.

997

998 **Video 3.** Combination of the structures of 2CMG-Ctf4<sub>3</sub> with Ctf4<sub>3</sub>–Pol  $\alpha$ -primase to generate a pseudo-  
999 atomic model of the 2CMG-Ctf4<sub>3</sub>–1Pol  $\alpha$ -primase core replicon factory, by overlapping the shared  
1000 Ctf4<sub>3</sub> density of the 2CMG-Ctf4<sub>3</sub> and Ctf4<sub>3</sub>–Pol  $\alpha$ -primase structures. The final model is rotated 360°  
1001 around a vertical axis.

1002

1003



1004 **Main Text Figures and Legends.**

1005

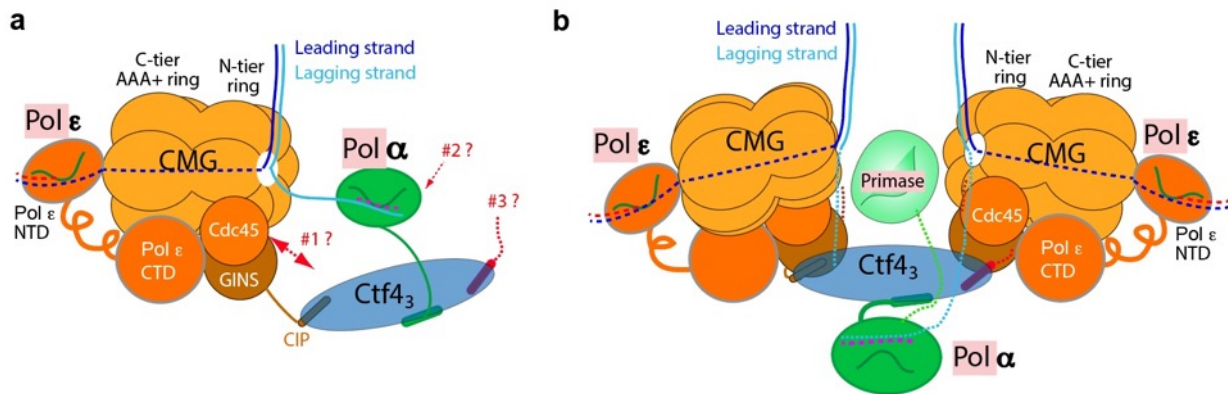

1006

1007 **Figure 1. Comparison of individual replisomes and a replisome factory.** (a) Individual  
1008 replisome: Ctf4<sub>3</sub> connects CMG to Pol  $\alpha$ -primase, and Pol  $\epsilon$  binds the C-face of CMG. Three  
1009 unanswered questions are represented by the three question marks: 1 – What components in  
1010 CMG, in addition to the CIP peptide of Sld5, interact with Ctf4<sub>3</sub> to maintain their stable  
1011 association? 2 – How does Pol  $\alpha$ -primase interact with Ctf4<sub>3</sub> – on the top N-face or the bottom C-  
1012 face of the Ctf4 disk? 3 – Can a second Pol  $\alpha$ -primase also occupy the third CIP-site of Ctf4<sub>3</sub>?  
1013 (b). Factory model of two replisomes inferred from cryoEM structures of the current report. Two  
1014 CMGs bind tightly to two subunits of the Ctf4 trimer by an extensive interface formed with the  
1015 Psf2 and Cdc45 subunits of CMG. One Pol  $\alpha$ -primase occupies the third Ctf4 subunit. The single  
1016 Pol  $\alpha$ -primase connects to the C-face of Ctf4 near the split points of DNA entering the N-faces  
1017 of the two CMGs. The two leading Pol  $\epsilon$  complexes bind the C-face of CMG on the outside  
1018 perimeter of the factory. See text for details.

1019

1020

1021

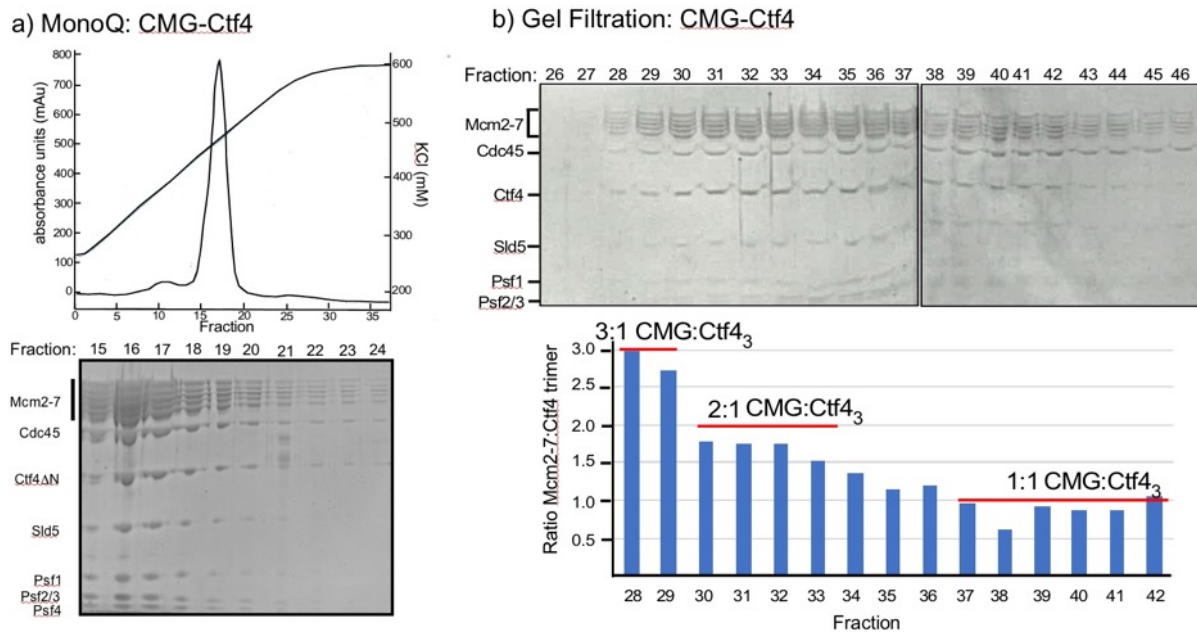

1022

1023

1024

1025

1026

1027

1028

1029

1030

**Figure 2. Multiple CMGs form a stable complex with the Ctf4 trimer.** (a) A mixture of CMG and Ctf4<sub>3</sub> were applied to ion-exchange chromatography on a MonoQ column. The top panel shows the elution profile the CMG-Ctf4<sub>3</sub> complex(s) which elute at approximately 450 mM NaCl. (b) The SDS PAGE of gel filtration fractions from the MonoQ elution shows the CMG-Ctf4 complex(s) are stable during these chromatography steps and density scans indicate ratios of CMG:Ctf4<sub>3</sub> as indicated in the histogram. Glycerol gradient centrifugations also reveal a complex of CMG to Ctf4<sub>3</sub>, as well as other complexes (**Figure 2 – figure supplement 1**).

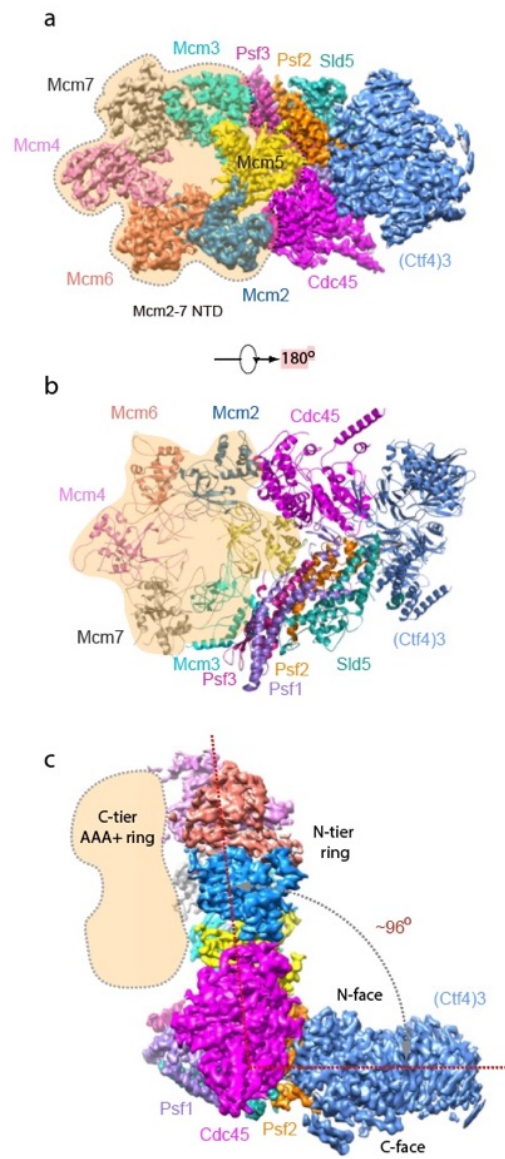

1031  
1032 **Figure 3. Cryo-EM structure of 1CMG-Ctf4<sub>3</sub>.** Cryo-EM density map of the 1CMG-Ctf4<sub>3</sub>  
1033 complex in: (a) top view looking down the N-tier view of Mcm2-7. (b) Cartoon representation of  
1034 the atomic model of 1CMG-Ctf4<sub>3</sub> in the C-tier AAA+ ring view. (c) Side view. Each subunit is  
1035 colored differently. The Mcm2-7 AAA+ motor ring is flexible, and thus removed for higher  
1036 resolution, but its position is shaded in beige. The resolution of this complex was facilitated by  
1037 focused 3D refinement omitting the AAA+ C-tier of the Mcms in CMG (Figure 3 – figure  
1038 supplements 1 and 2).  
1039

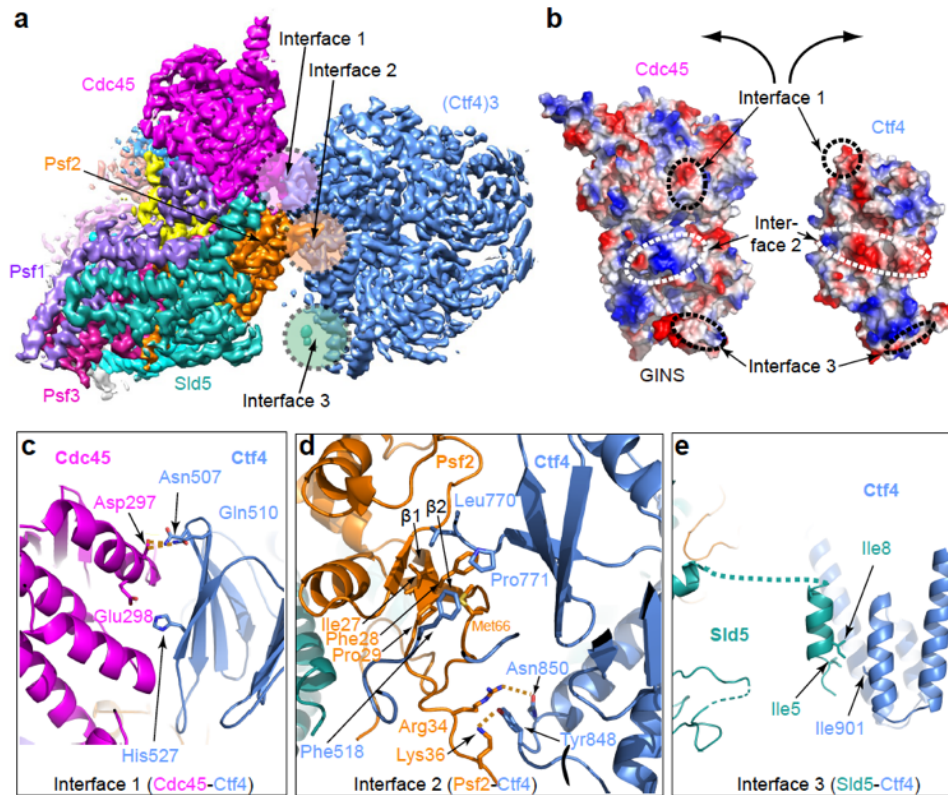

1041 **Figure 4. Molecular interface between Ctf4<sub>3</sub> and CMG.** (a) 3D map showing the interacting  
1042 Cdc45-GINS and Ctf4<sub>3</sub>. Different subunits are in different colors as labeled, and the three  
1043 interacting regions are labeled Interfaces 1 through 3. (b) An open-book view of the interface  
1044 between Cdc45-GINS and Ctf4<sub>3</sub>, shown in the electrostatic surface view. The three contacting  
1045 regions between Cdc45-GINS and Ctf4 are marked by three pairs of dashed ellipses. (c-e)  
1046 Interface 1 between Cdc45 and Ctf4 (c), interface 2 between Psf2 and Ctf4 (d), and interface 3  
1047 between Sld5 and Ctf4 (e), shown in cartoon view with several interacting residues shown in  
1048 sticks. A close-up view of the interfaces is shown in **Figure 4 – figure supplements 1 and 2**.  
1049 Conservation in the interface region is shown in **Figure 4 – figure supplement 3**.

1040

1041

1042

1043

1044

1045

1046

1047

1048

1049

1050

1051



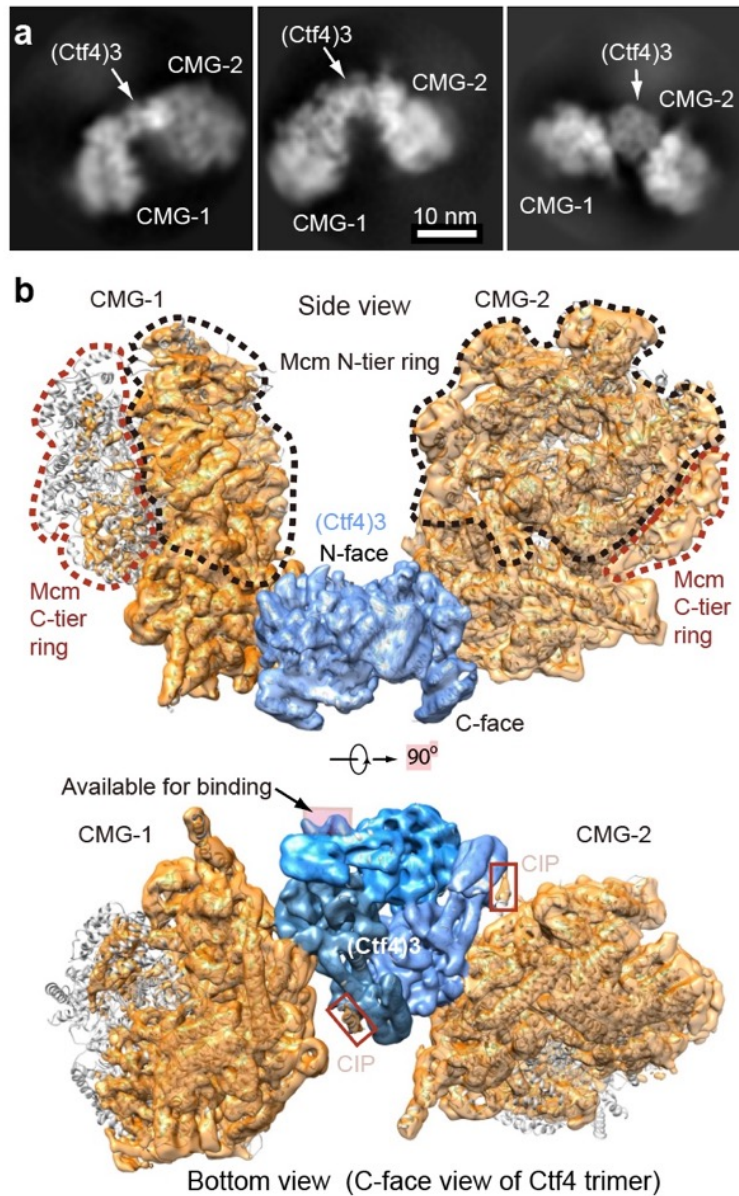

1052

1053

1054

1055

1056

1057

1058

**Figure 5. Cryo-EM structure of 2CMG-Ctf4<sub>3</sub>.** (a) Selected 2D class averages of cryo-EM images of 2CMG-Ctf4<sub>3</sub>. (b) A side and a bottom view of the 3D map with docked atomic models of Ctf4<sub>3</sub> and CMG shown in cartoon view. The C-tier AAA+ ring of Mcm2-7 is partially flexible and the density is invisible at the surface rendering threshold used. See also **Figure 5 – figure supplements 1 and 2** and **Video 2**.



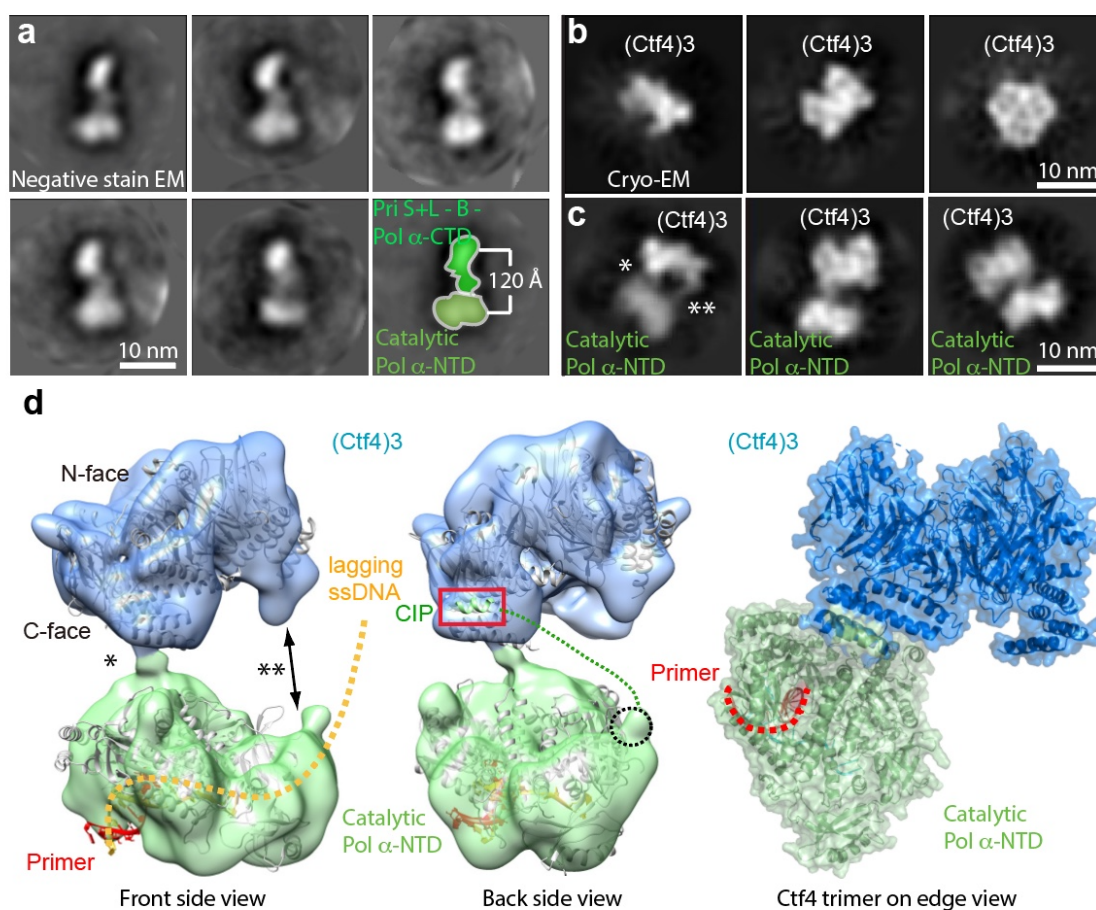

1059

1060

1061

1062

1063

1064

1065

1066

1067

1068

1069

1070

1071

1072

**Figure 6. Cryo-EM map of Ctf4<sub>3</sub>-Pol α-primase.** (a) Selected 2D class averages of negatively stained images of Pol α-primase showing the enzyme in a similar view with a two-lobed architecture. (b) 2D class averages of cryo-EM images of Ctf4<sub>3</sub> in three distinct views. (c) Three selected 2D class averages of cryo-EM images of Ctf4<sub>3</sub>-Pol α-primase. Note the primase lobe of Ctf4<sub>3</sub>-Pol α-primase is not visible. (d) Left and middle panels: front and back views of the surface-rendered cryo-EM 3D map of Ctf4<sub>3</sub>-Pol α-primase docked with the crystal structure of Ctf4 in light blue and crystal structure of the catalytic Pol α-NTD in light green. Right panel: atomic model viewed when the Ctf4 trimer is orientated horizontal and on edge. Rigid body docking is further presented in **Figure 6 – figure supplement 1**. The asterisk (\*) and double asterisk (\*\*) in (c, d) mark the left and right contacts, respectively, between Ctf4<sub>3</sub> and Pol α-NTD. The right contact is not visible in the 3D map (d). Increasing the concentration of Pol α-primase did not give additional Pol α-primase bound to Ctf4 (**Figure 6 – figure supplement 2**).

a) Cooperative CMG-Ctf43-Pol  $\alpha$ -primase binding

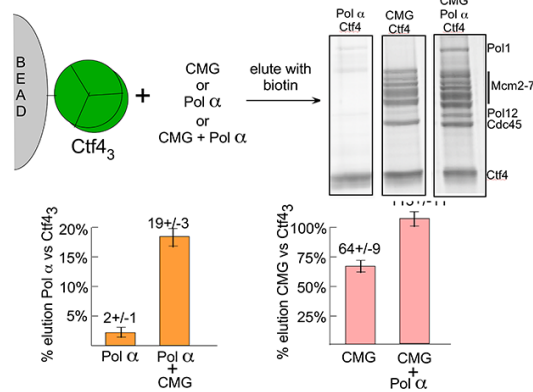

b) Helicase assay: CMG vs 2CMG-Ctf4<sub>3</sub>

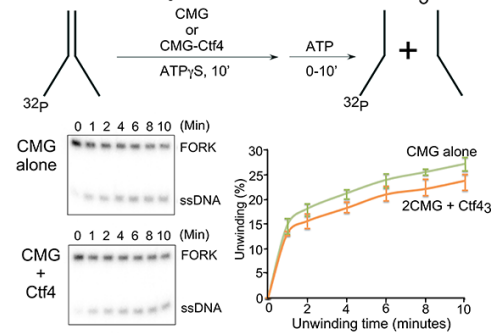

c) Replication assay: CMG vs 2CMG-Ctf4<sub>3</sub>

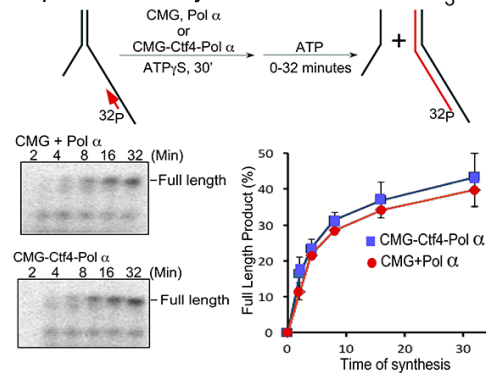

**Figure 7. Cooperative assembly of the CMG-Ctf4<sub>3</sub>-Pol  $\alpha$ -primase complex.** (a) Streptag-Ctf4 trimer on streptactin magnetic beads was added to either Pol  $\alpha$ , CMG or a mix of Pol  $\alpha$  + CMG. Proteins were eluted with biotin and analyzed by SDS PAGE (upper right). The assay was repeated in triplicate and gel scans were quantitated (below). Error bars show the standard deviation. (b-c). Both CMGs in the 2CMG-Ctf4<sub>3</sub> factory are active. (b) Top: Scheme of the helicase assay. CMG or a 2CMG+1Ctf4<sub>3</sub> mix were preincubated with forked DNA and 0.1 mM ATP $\gamma$ S for 10 min, followed by 5 mM ATP. Ten minutes is sufficient for CMG to bind the DNA as shown in **Figure 7 – figure supplement 3**. Bottom: Representative time courses of helicase activity are shown in the native PAGE gels (left), and results of triplicate assays are shown in the plot (right). Results of additional CMG:Ctf4 ratios are shown in **Figure 7 – figure supplement 3a**. (c) Scheme of the replication assay. CMG or a 2CMG+1Ctf4<sub>3</sub> mix were preincubated with Pol  $\alpha$ -primase, <sup>32</sup>P-primed fork DNA and 0.1 mM ATP $\gamma$ S for 30', followed by 5 mM ATP, 4 mM dNTPs. 30 min is sufficient for CMG and Pol  $\alpha$ -primase to bind the primed forked DNA as shown in **Figure 7 - figure supplement 4a**. Bottom: Representative time courses of replication activity are shown in the gels (left) and results of triplicate assays are shown in the plot (right). Additional replication assays of preformed CMG-Ctf4<sub>3</sub> complexes are shown in **Figure 7 – figure supplement 4b**.

1073  
1074  
1075  
1076  
1077  
1078  
1079  
1080  
1081  
1082  
1083  
1084  
1085  
1086  
1087  
1088

1089

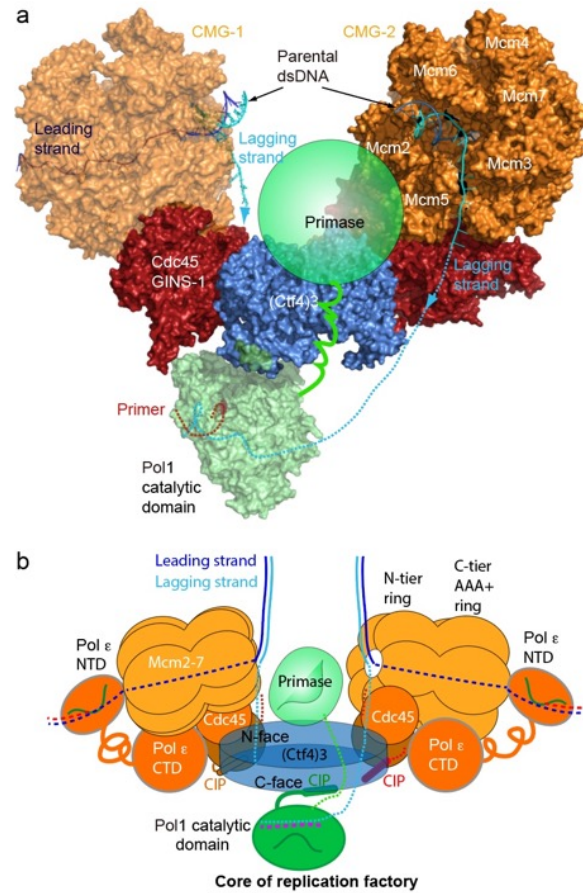

1090

1091

1092

1093

1094

1095

1096

1097

1098

1099

1100

**Figure 8. A model for the coupled sister replisomes. (a)** A composite atomic model of one Pol  $\alpha$ -primase and two CMG helicases organized in a core factory with a Ctf4 trimer. The model is derived by aligning Ctf4<sub>3</sub> shared between the Ctf4<sub>3</sub>-CMG dimer model and the model of Ctf4<sub>3</sub>-Pol  $\alpha$  NTD. The DNA structure is based on the structure of CMG-forked DNA (PDB 5U8S), but the lagging strand outside the CMG channel is modeled. The possible location of the primase module of Pol  $\alpha$ -primase is indicated by a green ellipse. **(b)** A sketch illustrating the leading strand Pol  $\epsilon$  at the C-tier face of the CMG helicase and the primase reaches atop the N-face of Ctf4<sub>3</sub>, potentially capable of priming both the lagging strands. See text for details. See also **Figure 8 – figure supplements 1, 2, and Video 3.**

1101 **Figure Supplements and their legends:**

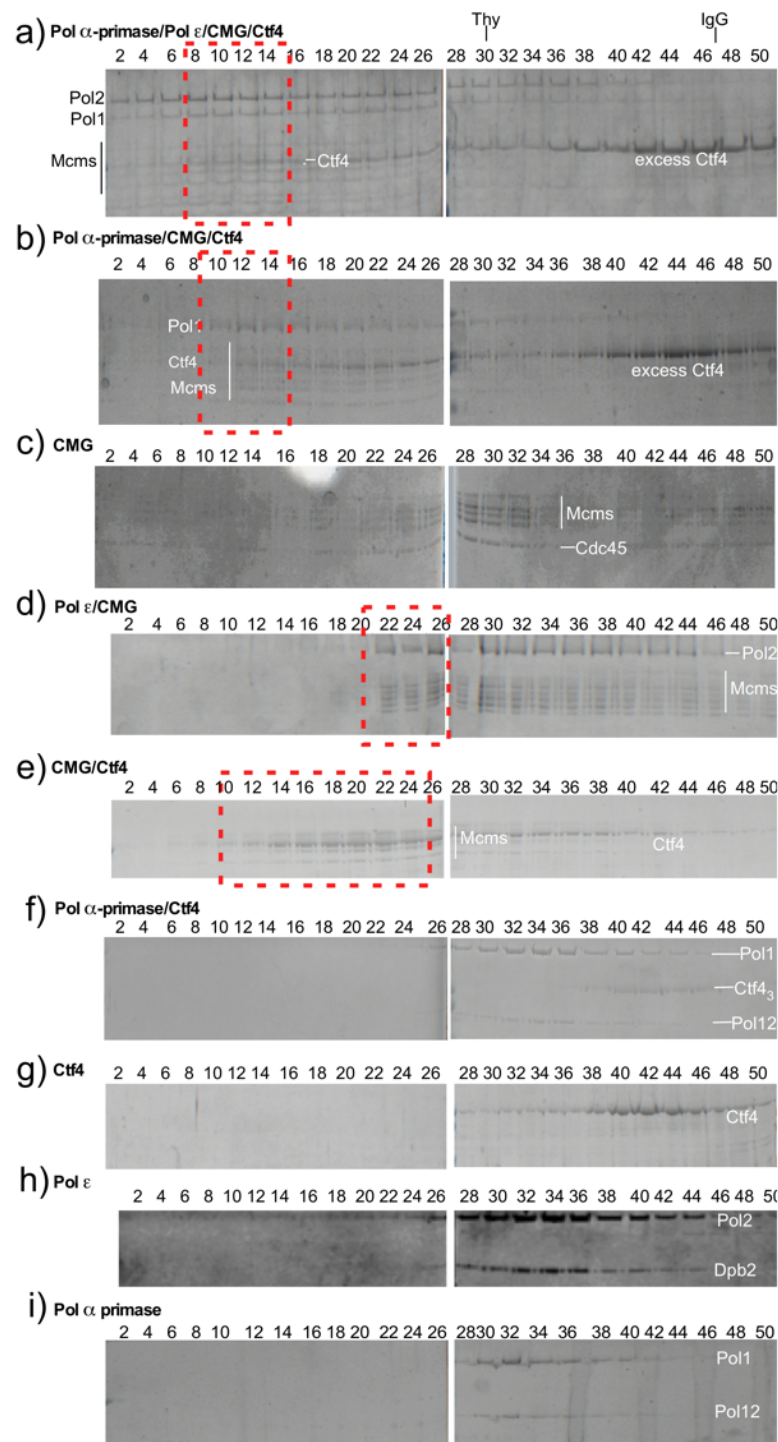

1102  
 1103 **Figure 2 - figure supplement 1. Reconstitution of replisome complexes.** Glycerol gradient  
 1104 sedimentation of different protein mixtures. Panels a and b (red boxes), compared to panels c-i,  
 1105 indicate that Ctf4 promotes large super-complexes containing CMG and DNA polymerases. Pol ε binds  
 1106 CMG in the absence of Ctf4<sub>3</sub> (red box, panel d), and Ctf4<sub>3</sub> binds CMG (red box, panel e) as noted by the  
 1107 significant shift to a higher mw complex. Migration of protein standards, Thyroglobulin (Thy) and IgG,  
 1108 are shown at the top.



1109  
1110

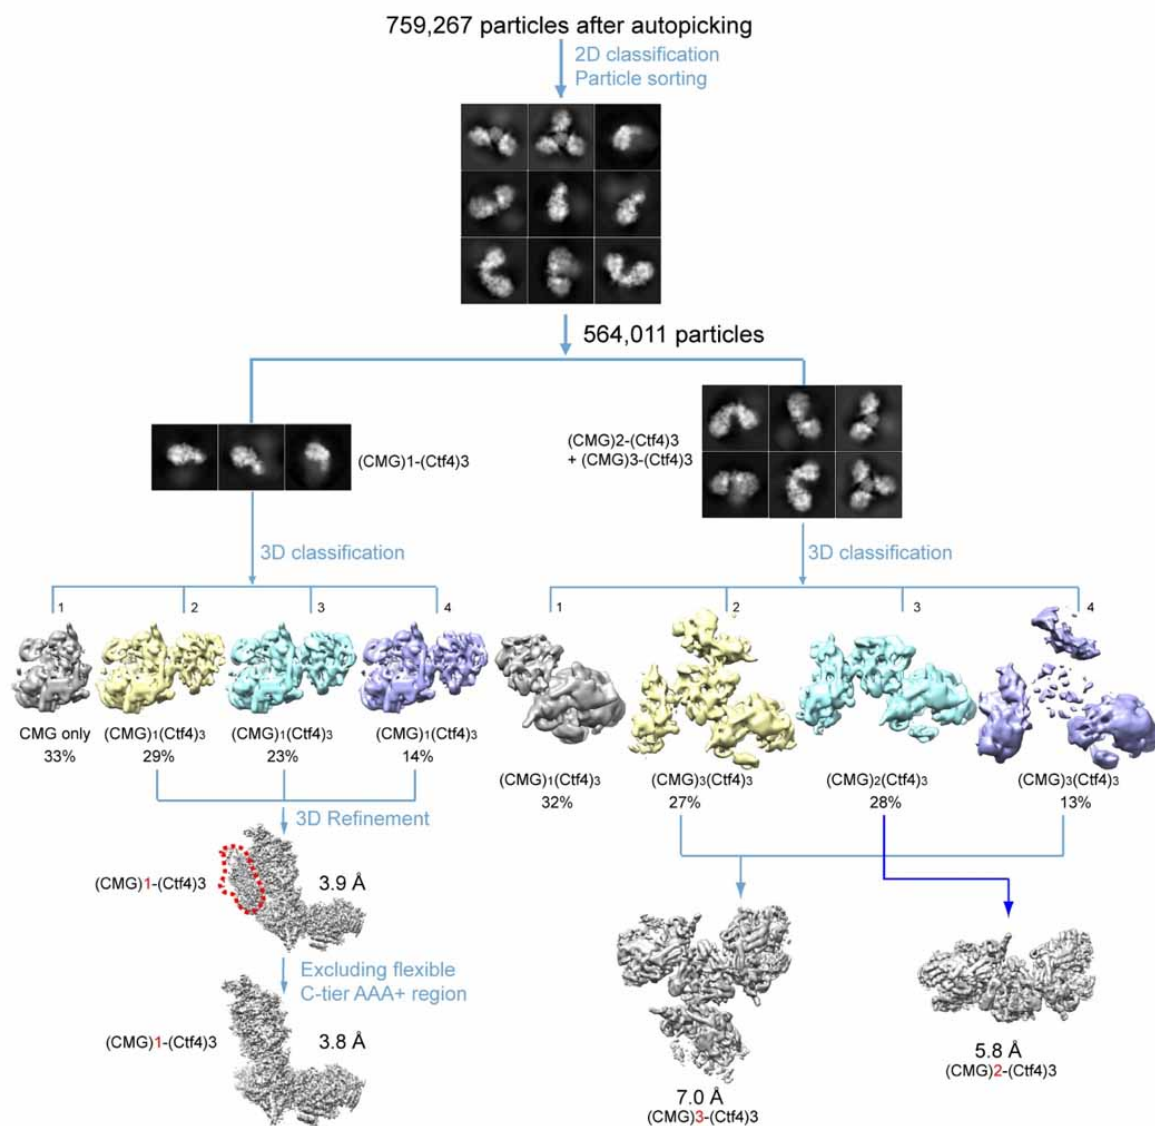

1111  
1112  
1113  
1114  
1115  
1116  
1117

**Figure 3 – figure supplement 1. Image processing and 3D reconstruction scheme.** Extensive 2D and 3D classifications led to reconstruction of 3D maps of the 1CMG-Ctf4<sub>3</sub> complex<sub>1</sub> at 3.8 Å resolution, the 2CMG-Ctf4<sub>3</sub> complex at 5.8 Å resolution, and the 3CMG-Ctf4<sub>3</sub> complex at 7.0 Å resolution.



1118

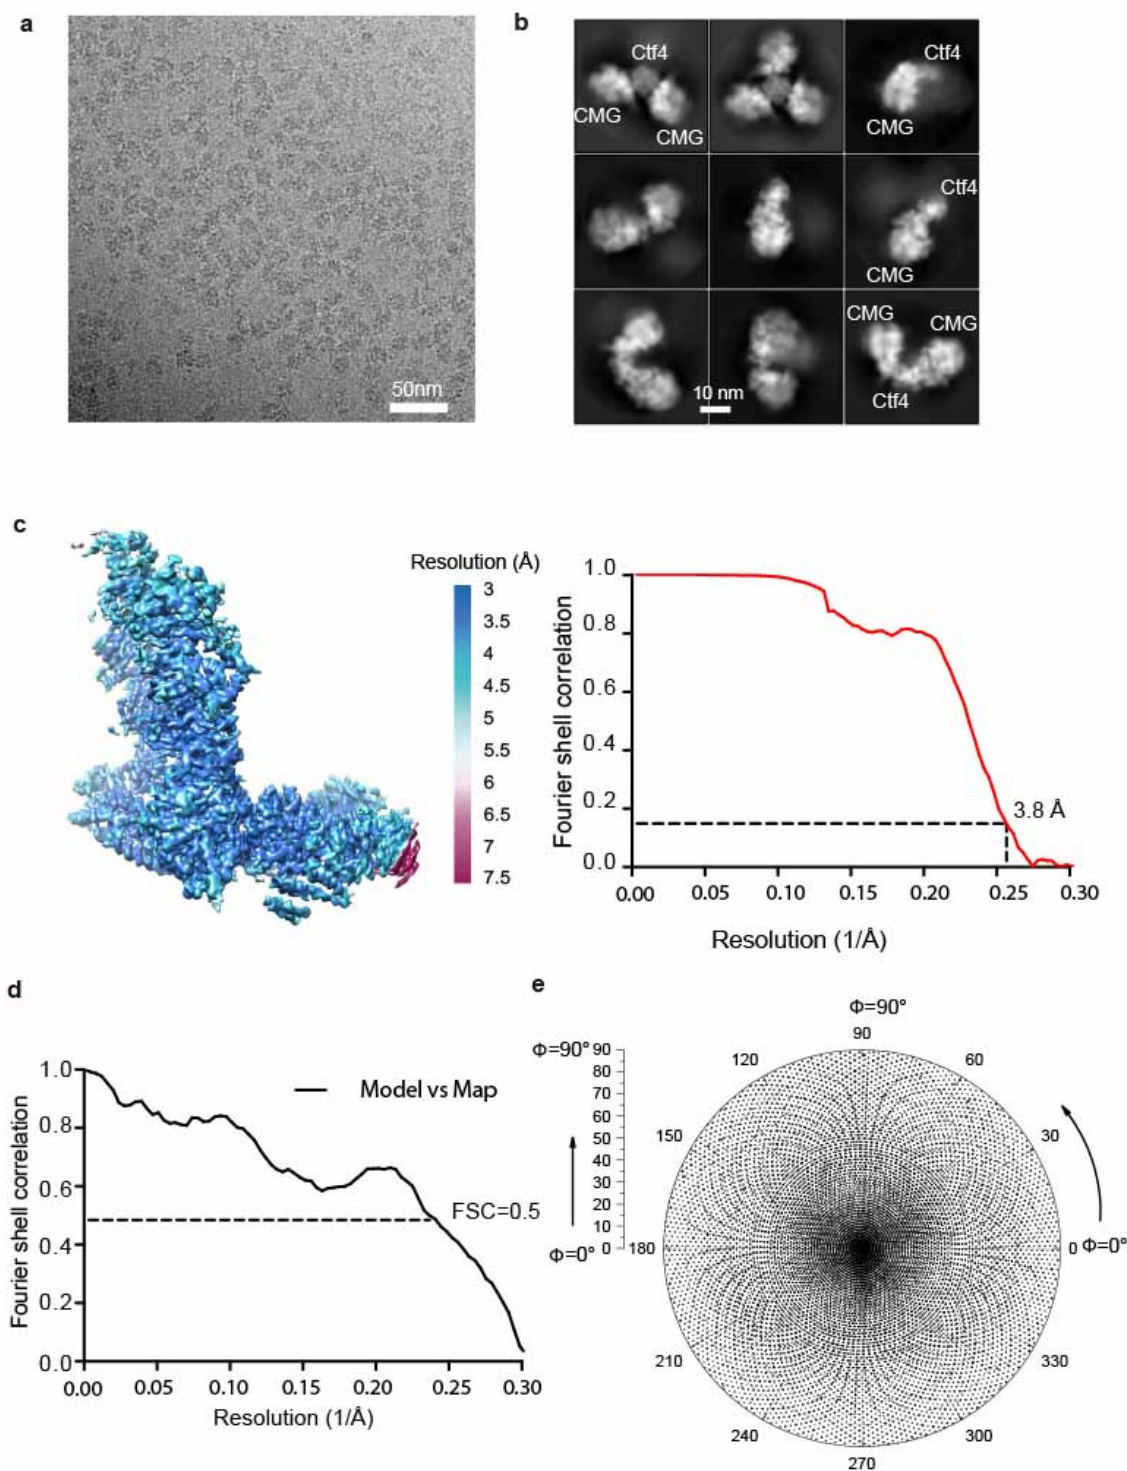

1119  
1120  
1121  
1122  
1123  
1124  
1125  
1126  
1127

**Figure 3 – figure supplement 2. Image processing and resolution estimation of the 3D map of the 1CMG-Ctf4<sub>3</sub> complex.** (a) A typical raw micrograph. (b) 2D classification reveals the presence of 1, 2 or 3 copies of CMG helicase in complex with Ctf4<sub>3</sub>. (c) Color-coded surface rendering of the 3D map (left panel) and the gold-standard Fourier shell correlation curve (right panel) of the 1CMG-Ctf4<sub>3</sub> complex masking out the flexible C-tier motor ring of the Mcm2-7. (d) Gold-standard Fourier shell correlation of the atomic model versus the 3d map. (e) Euler angle distribution of the raw particles used in 3D reconstruction.

1128  
1129  
1130

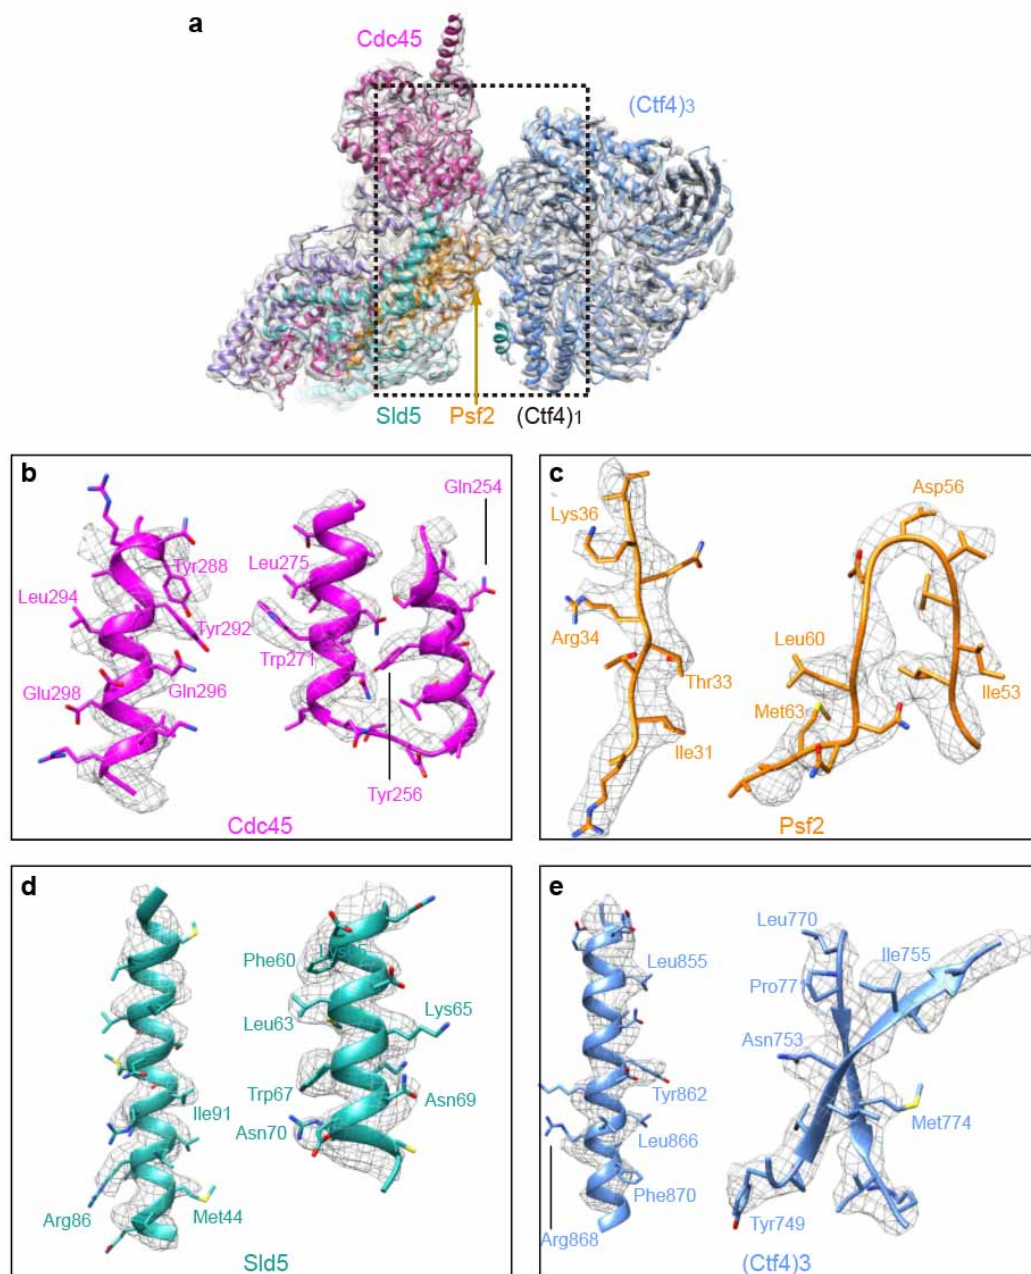

1131  
1132

1133 **Figure 4 – figure supplement 1. Detailed densities at selected regions in the 3D map of**  
1134 **Ctf4<sub>3</sub>–CMG<sub>1</sub> complex. (a)** 3D density showing the Ctf4<sub>3</sub>–Cdc45–GINS, by omitting the Mcm2-7  
1135 density in the 3d map, superimposed with the atomic model. Each subunit is colored differently and as  
1136 labeled. **(b-e)** Two example regions in Cdc45 **(b)**, Psf2 **(c)**, Sld5 **(d)**, and Ctf4 **(e)** with several side  
1137 chains shown as sticks.

1138

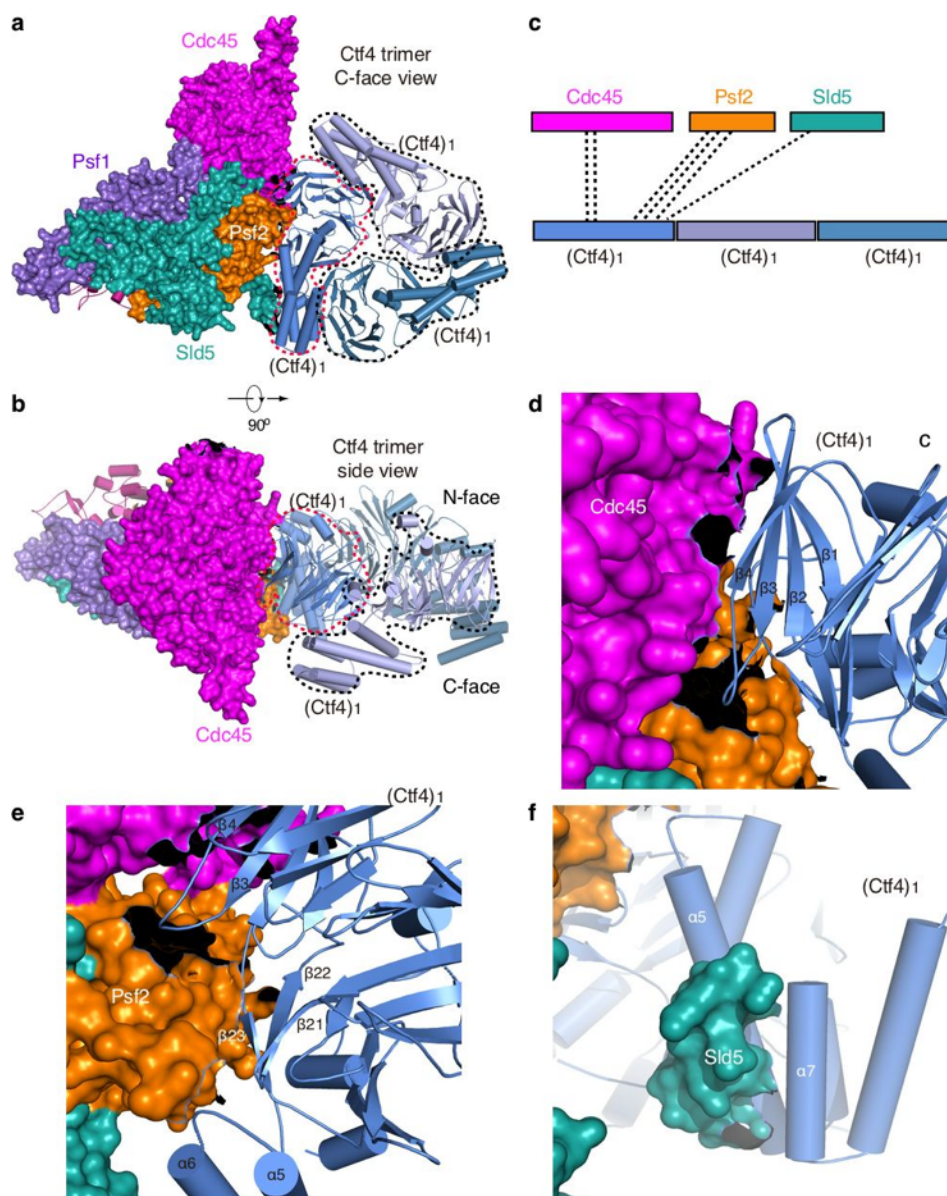

1139  
1140  
1141  
1142  
1143  
1144  
1145  
1146  
1147  
1148

**Figure 4 – figure supplement 2. Only one Ctf4 subunit engages with Cdc45 and GINS of one CMG helicase.** The 1CMG-Ctf4<sub>3</sub> structure viewed from the C-face (a) and side (b) of the Ctf4<sub>3</sub> disk. Cdc45 and GINS are shown in surface and the Ctf4<sub>3</sub> in cartoon. The interacting Ctf4 monomer is demarcated by a dashed red curve, and the remaining two non-interacting monomers by dashed black curves. (c) A sketch showing Cdc45 and GINS interact with only one Ctf4 monomer. (d-f) Interfaces between the interacting Ctf4 monomer and Cdc45 (d), Psf2 (e), and Sld5 (f).



**a** Amino acid sequence of Cdc45

Sc 291 LYPLIQDEVKRLTPSS 306  
 Sp 273 SYSLLKDEVNRLNPSP 288  
 Dm 257 ELEQIQSHVSRLTNKT 272  
 Mm 241 DVGILQRHVSRHNHRN 256  
 Dr 247 DIATLQRHVSRHNHNK 262  
 Hs 273 DVGVLQRHVSRHNHRN 288

**b** Amino acid sequence of Psf2

Sc 21 <sup>\*\*\*</sup>ENEPIKIFFRITTRQKIRGD 40  
 Sp 21 GNEYINIVPSETMDQLP--- 37  
 Dm 11 EKCMISIPNFSNEPLH--- 27  
 Mm 11 EKELVTIPNFSLDKIY--- 27  
 Dr 11 EKEMVKIPNFSLDKIY--- 27  
 Hs 11 EKELVTIPNFSLDKIY--- 27

**c** Amino acid sequence of Ctf4

Sc Ctf4 726 MEIWKMSGGKETTDIHVNPALAYD--TLNCLLVKGGKHIWEEFFPLPLPSEMEIRMPV ADTEA  
 Sp Mc11 655 -ELERRKSROES----YWPVIVADN--QFHCILLKGASRYFYFPRMTEFDRIIP- CNTNN  
 Mm And1 622 ---EHCKGKSDH----YVVVGIHENPQQLRCIPCKGSRFPPTLPRPAVAILLSFKLEY CQTST  
 Hs And1 666 ---EHCKGKSDH----YVVVGIHENPQQLRCIPCKGSRFPPTLPRPAVAILLSFKLEY CQIAT

Sc Ctf4 807 EEGEED IPVSMAAEEYLRSKVLSLELITDILENDGEMVGNENEVLAALNGAYDKALLRLFAS  
 Sp Mc11 709 PDASTS VPV---LEEQLRNKLEFLTLEDSI-GDGDVTEDEKISIRLEANIDKALLQLIQK  
 Mm And1 677 EKGQ-- -----MEEQFVHWSVLFHNYL-DYLAKNQ--VDYEESEIKNOAVKEQQELLMKMLAL  
 Hs And1 721 EKGQ-- -----MEEQFVRSVIFHNHL-DYLAKNQ--VEYEESTKNOATKEQQELLMKMLAL

Sc Ctf4 873 ACSQDNVEKALSIAHEIKQDRALTAAVKIS  
 Sp Mc11 767 ACLEERIERVYEIKTIRRTSIAAAQKIA  
 Mm And1 728 SCKLEREFRCVEIA-DIMTQNAVHLAIKYA  
 Hs And1 772 SCKLEREFRCVEIA-DIMTQNAVNLAIKYA

1149  
 1150  
 1151  
 1152  
 1153  
 1154  
 1155  
 1156  
 1157  
 1158

**Figure 4 – figure supplement 3. Sequence alignment of the Ctf4-contacting regions in CMG, Psf2 and Cdc45. (a)** Conserved sequences in Cdc45 that contact Ctf4. **(b)** Conserved sequences in Psf2 that contact Ctf4. **(c)** Conserved sequences in Cdc45 that contact Psf2 and Cdc45. The asterisks mark the conserved hydrophobic residue at the interface between Psf2 and Ctf4. Sc: *Saccharomyces cerevisiae*; Sp: *Saccharomyces pombe*; Dm: *Drosophila melanogaster*; Mm: *Mus musculus*; Dr: *Danio rerio*, Hs: *Homo sapiens*. Invariant residues are highlighted in green, identical residues in Yellow, and similar residues in cyan.

1159

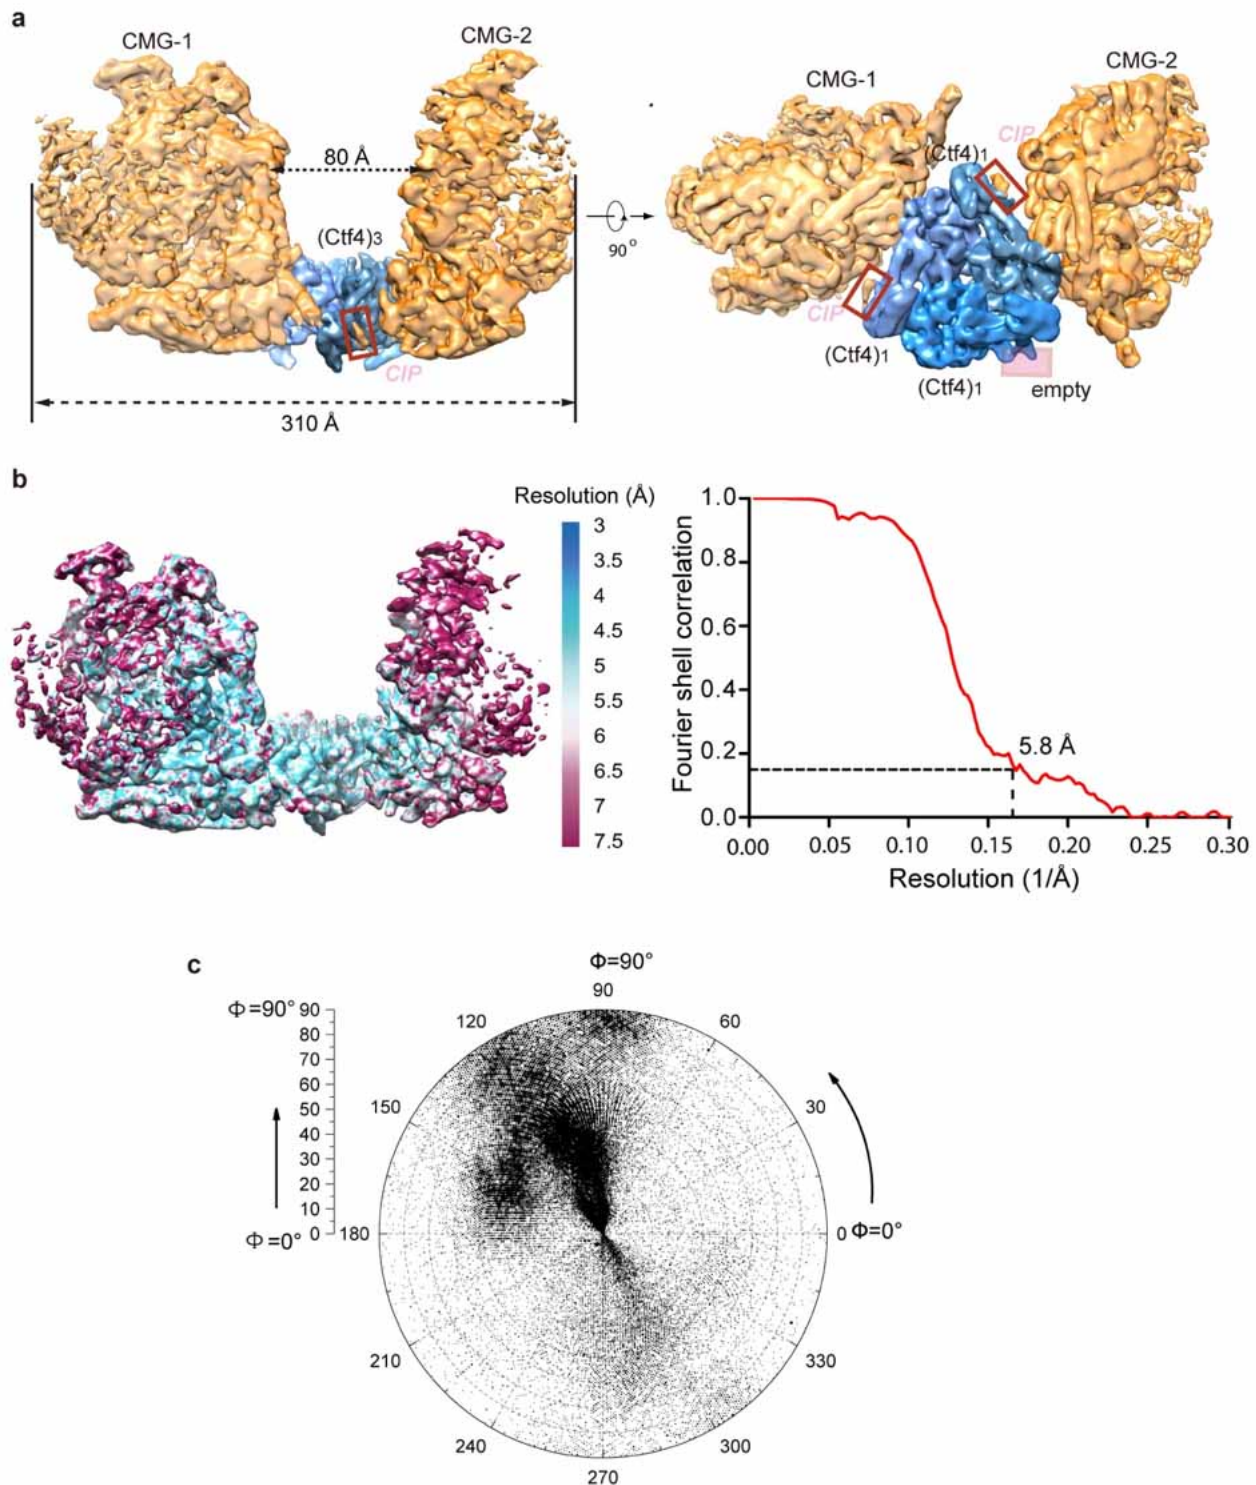

**Figure 5 – figure supplement 1. 3D map and resolution estimation of Ctf4<sub>3</sub> in complex with two CMG.** (a) Surface-rendered 3D map of 2CMG-Ctf4<sub>3</sub> in side view (left) and bottom view from the C-face of Ctf4<sub>3</sub> (right), (b) Color-coded 3D map of 2CMG-Ctf4<sub>3</sub> according to the local resolution (left) and the gold-standard Fourier shell correlation of the two half maps. (c) Euler angle distribution of raw particles used in 3D reconstruction.

1160  
1161  
1162  
1163  
1164  
1165  
1166  
1167



1168

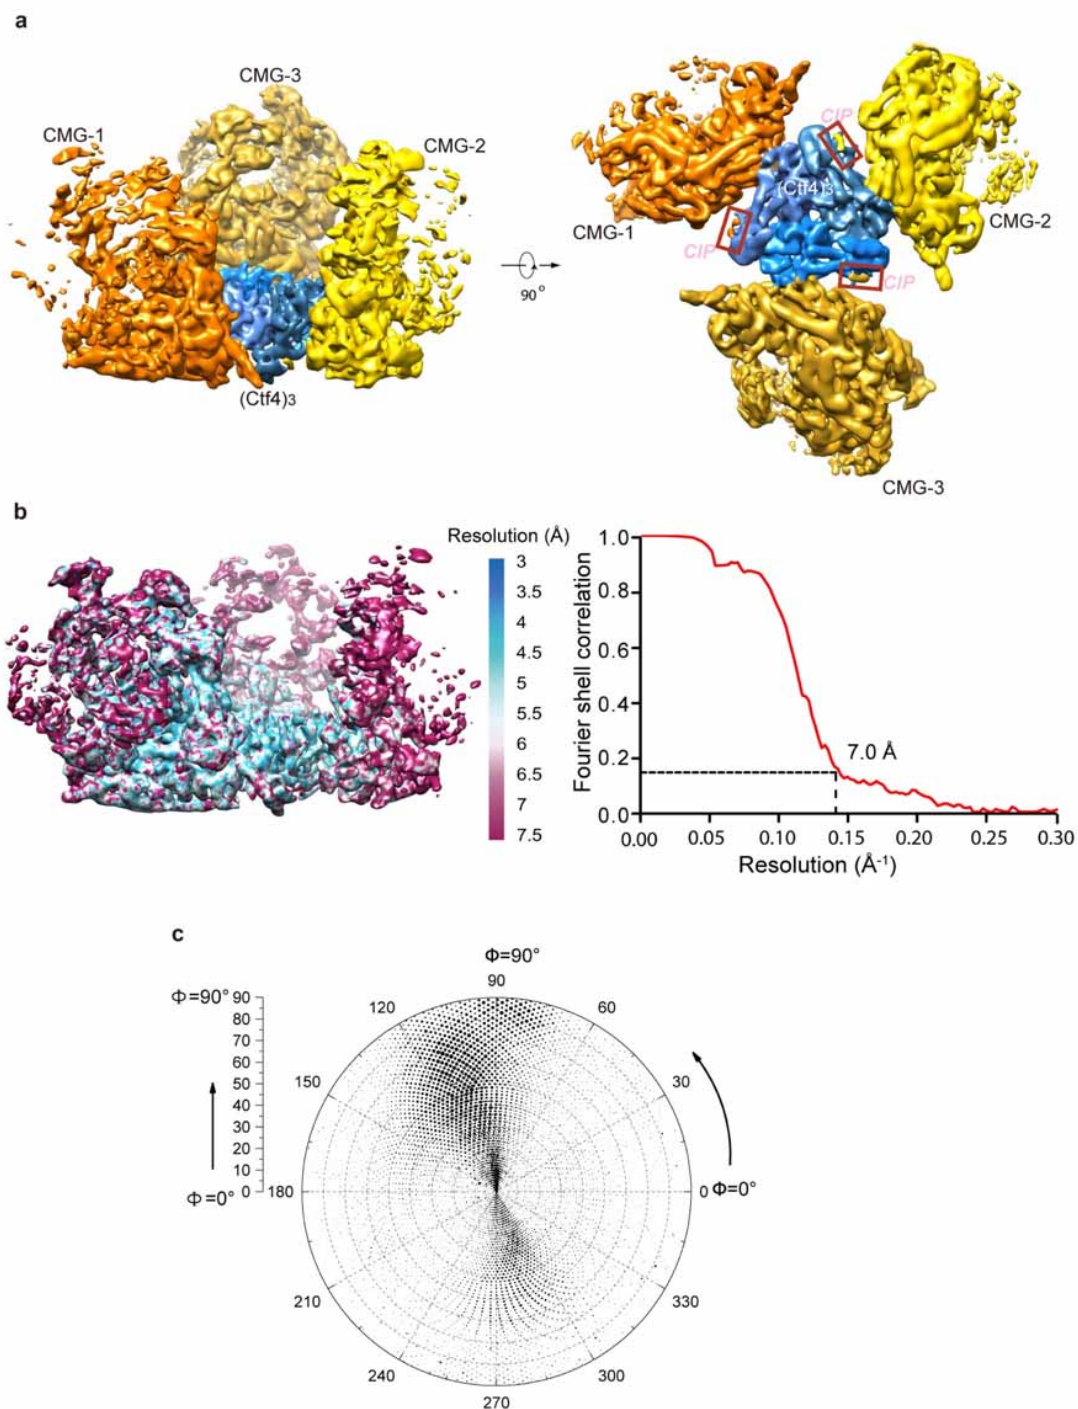

1169  
1170  
1171  
1172  
1173  
1174  
1175  
1176  
1177  
1178

**Figure 5 – figure supplement 2. 3D maps and resolution estimation of Ctf4<sub>3</sub> in complex with three CMG.** (a) Surface-rendered 3D map of 3CMG-Ctf4<sub>3</sub> in side (left) and bottom (right, C-face of Ctf4<sub>3</sub>). (b) Color-coded 3D map of 3CMG-Ctf4<sub>3</sub> according to the local resolution (left) and the gold-standard Fourier shell correlation of the two half maps. (c) Euler angle distribution of raw particles used in 3D reconstruction.

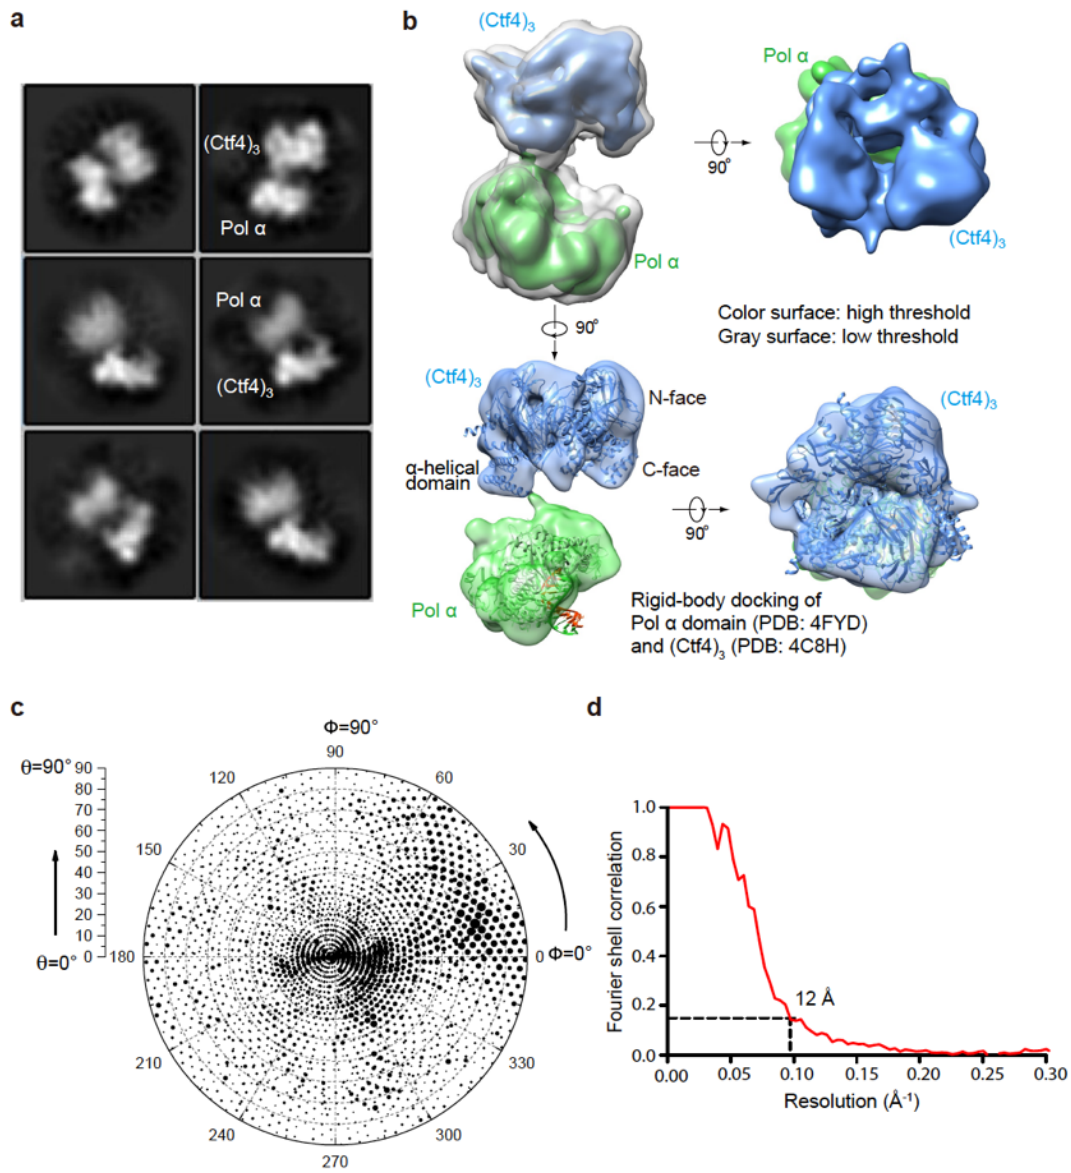

1179  
1180  
1181  
1182  
1183  
1184  
1185  
1186  
1187  
1188  
1189  
1190  
1191  
1192

**Figure 6 – figure supplement 1. Cryo-EM of the Pol1-Ctf4<sub>3</sub> complex.** (a) 2D averages of Ctf4<sub>3</sub>-Pol 1. (b) 2D classification reveals the presence of 1 Pol α bound to Ctf4<sub>3</sub>. Side (left) and end-on (right) views of the 3D reconstruction of Pol 1-Ctf4<sub>3</sub> complex are shown. Only the Pol1 subunit (green) of Pol α-primase is observed with Ctf4<sub>3</sub> (blue) in the Pol α-primase-Ctf4<sub>3</sub> 3D reconstruction. In the end-on view, Pol1 appears to occlude the C-face of the Ctf4 trimer. The upper left structure shows both low and high thresholds, in grey and in color, respectively. The crystal structures of Pol1-DNA (4FYD) and the C-terminal half of Ctf4 (4C8H) were docked by rigid body docking of the unaltered crystal structures into semi-transparent views of the density at the bottom of panel b. (c, d) The Euler angle distribution and the FSC resolution curve are shown in panels c and d, respectively.

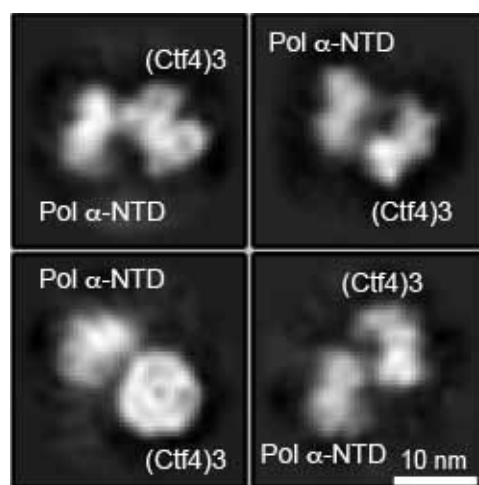

1193  
1194  
1195  
1196  
1197  
1198

**Figure 6 – figure supplement 2. Only one Pol α-primase is observed to bind to the Ctf4 trimer using 3 fold excess Pol α-primase to Ctf4<sub>3</sub>.** Cryo-EM 2D averages of protein mixtures containing Ctf4<sub>3</sub>:Pol α-primase in a 1:3 molar ratio show no more than one Pol α-primase bound to Ctf4<sub>3</sub>.

1199  
1200  
1201

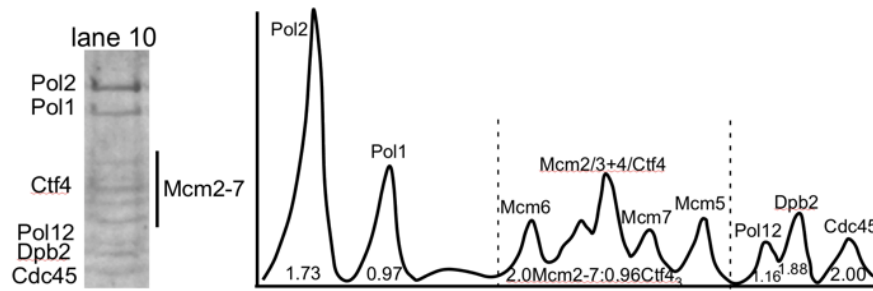

1202  
1203

1204 **Figure 7 – figure supplement 1. Densitometry analysis of CMGE-Ctf4<sub>3</sub>-Pol α-primase.** Lane 10 of  
1205 the SDS-PAGE of Figure S1a is shown to the left. The densitometry scan of the SDS gel lane 10 (right)  
1206 was analyzed using ImageJ and indicates 2CMGE-1Ctf4<sub>3</sub>-1Pol α-primase. The area of the Cdc45 peak  
1207 was used as a proxy for CMG stoichiometry, and the area of the Cdc45 peak divided by the Cdc45 mw  
1208 was assigned a value 2.0 because molar areas of Pol1, Pol12, and Ctf4<sub>3</sub> were about half the molar value  
1209 of Cdc45. The amount of Ctf4<sub>3</sub>, which overlaps Mcm4, was determined in two steps. First, the area of  
1210 the Mcm2-7 region was divided by the molecular weight of Mcm2-7. The difference in area was  
1211 deduced to belong to Ctf4<sub>3</sub>, and calculated based on the molecular weight of a Ctf4 trimer. Calculated  
1212 values are shown under the peaks. The stoichiometry approximates to 2 Cdc45 (and thus 2 Mcm2-7), 1  
1213 Ctf4<sub>3</sub>, 1 Pol α, and 2 Pol ε.

1214  
1215

1216  
1217  
1218

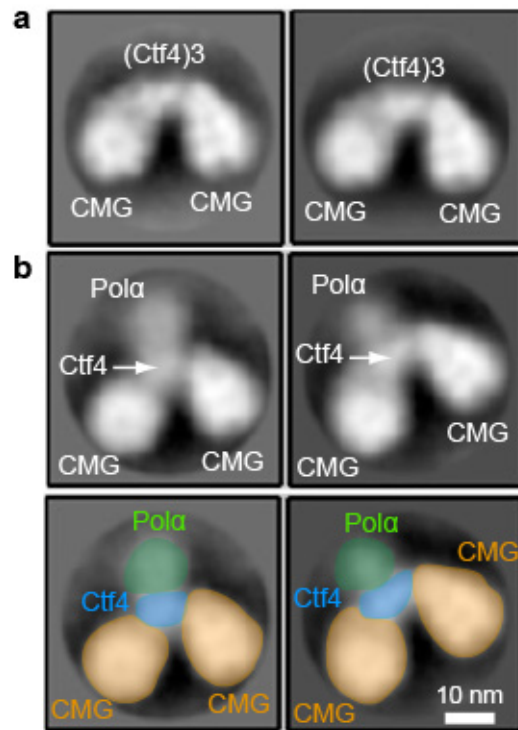

1219  
1220  
1221  
1222  
1223  
1224  
1225  
1226  
1227  
1228  
1229  
1230  
1231  
1232

**Figure 7 – figure supplement 2. EM observations of a 2CMG-Ctf4<sub>3</sub>-1-Pol α-primase complex. (a)** 2D class averages of negatively stained EM images of CMG plus Ctf4 trimer indicate a 2CMG-Ctf4<sub>3</sub> complex. **(b)** The top panels are 2D class averages of negatively stained EM images of a mixture of CMG, Ctf4 trimer and Pol α-primase, which we interpret as a complex of 2CMG-Ctf4<sub>3</sub>-1Pol α-primase. The bottom panels explain the interpretation of the images in the top 2D averages of panel b using yellow to color CMGs, blue to color the Ctf4 trimer, and green to color the Pol1 subunit of Pol α-primase. See text for details.



1233

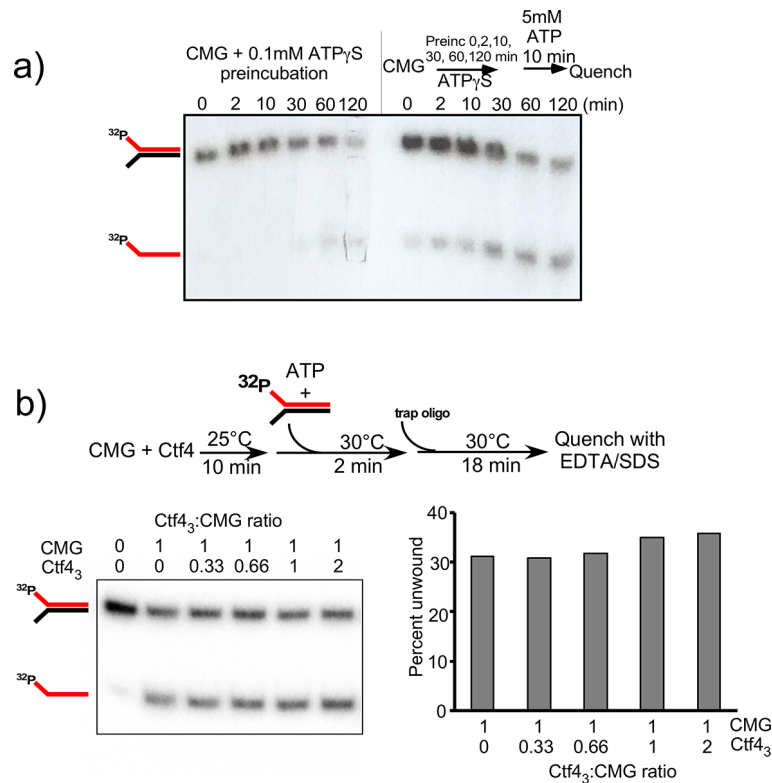

1234

1235

1236

1237

1238

1239

1240

1241

1242

1243

1244

1245

1246

1247

**Figure 7 – figure supplement 3. Establishing preincubation conditions for CMG binding to DNA before adding ATP for unwinding in helicase assays. (a) Top:** Native gel of the effect of preincubating DNA with CMG and 0.1 mM ATP $\gamma$ S for up to 120 min is shown in the left half of the gel. The right half shows the same preincubation with ATP $\gamma$ S followed by adding 5 mM ATP for 10 min before loading onto the gel. **(b) Top:** Scheme of the assay using CMG:Ctf4<sub>3</sub> formed using different ratios as indicated below. Helicase assays were performed by preincubating stock solution of CMG with Ctf4<sub>3</sub> to form the complex before adding 20 nM CMG in the CMG/Ctf4<sub>3</sub> mixture to reactions containing forked DNA having one strand 5' labeled with <sup>32</sup>P. Reactions were initiated upon adding DNA and 2 mM ATP, 50 nM unlabeled LEADING helicase oligo was added as a trap 2' after initiating the reaction, then reactions were quenched and analyzed by native PAGE. **Bottom:** Autoradiogram of the native PAGE (left). The histogram plot of the quantitation of the autoradiogram is shown to the right.

1248

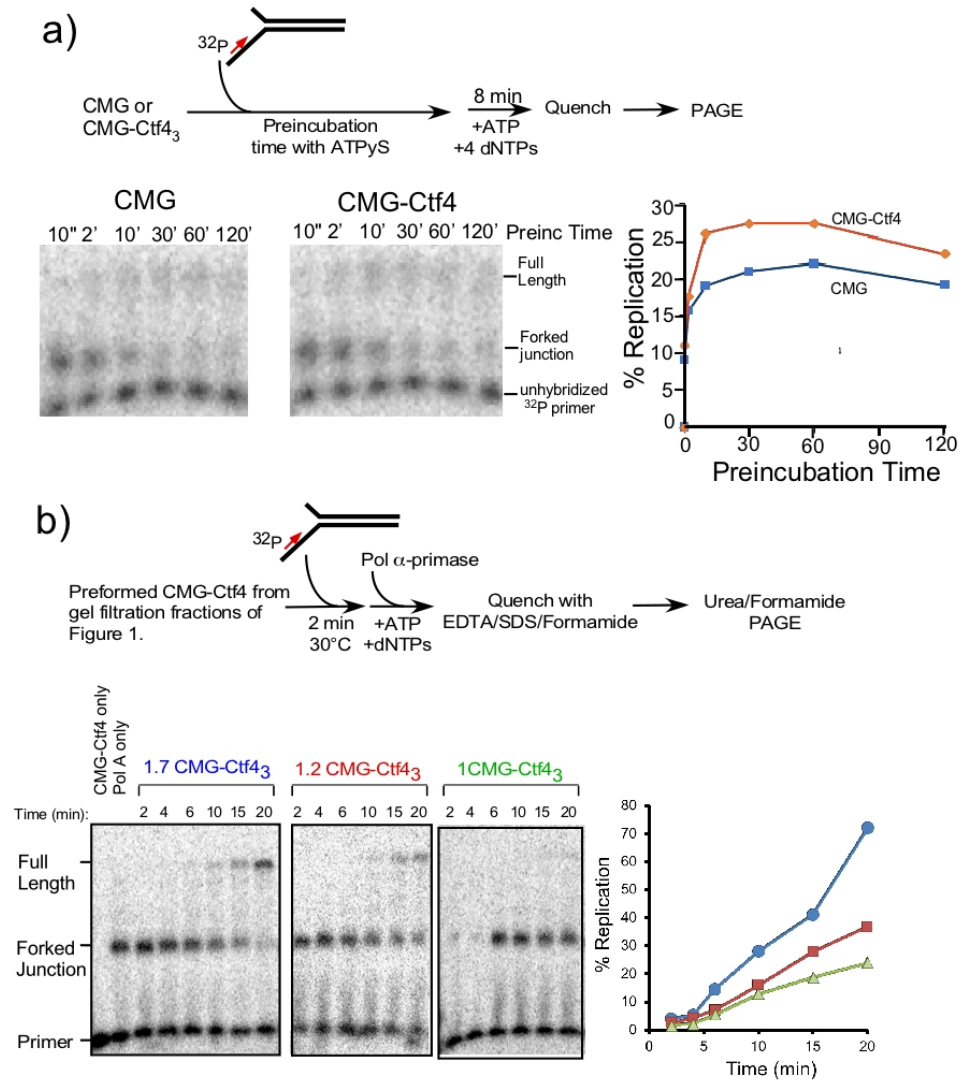

1249

1250

1251 **Figure 7 – figure supplement 4. Establishing preincubation conditions for CMG binding to primed**

1252 **fork DNA – before initiating DNA replication. (a) Top: scheme of the assay. Reactions containing**

1253 **reconstituted 20nM CMG +/- Ctf4 were preincubated with 0.5 nM <sup>32</sup>-P primed fork DNA and 100 μM**

1254 **ATP<sub>γ</sub>S for the times indicated, followed by an 8 min pulse of replication using 5 mM ATP and 100 μM**

1255 **each dNTP. Bottom: results of the assays in denaturing PAGE (left) and quantitation (right). b)**

1256 **Replication results using isolated preformed CMG-Ctf4. Top: Scheme of the assay. 20 nM Ctf<sub>4</sub>**

1257 **contained within either 1.7CMG-Ctf<sub>4</sub><sub>3</sub> (fraction 31 from Fig. 1b), 1.2CMG-Ctf<sub>4</sub><sub>3</sub> (fraction 35) or**

1258 **1.0CMG-Ctf<sub>4</sub><sub>3</sub> (fraction 37) were preincubated for 2 min with a <sup>32</sup>P-primed fork for 2 min, then 20 nM**

1259 **Pol α-primase was added for the times indicated in panel b, followed by quenching and analysis in a**

1260 **denaturing gel. Bottom: Denaturing PAGE of replication assays (left), and quantitation (right). It is**

1261 **important to note that because equal amounts of Ctf<sub>4</sub> were added to the assays, a fraction containing 1.7**

1262 **CMG:1Ctf<sub>4</sub><sub>3</sub> has 1.7 times the CMG compared to a reaction containing 1.0 CMG:1Ctf<sub>4</sub><sub>3</sub>.**

1263

1264

1265

1266

1267  
1268  
1269  
1270  
1271  
1272  
1273  
1274  
1275

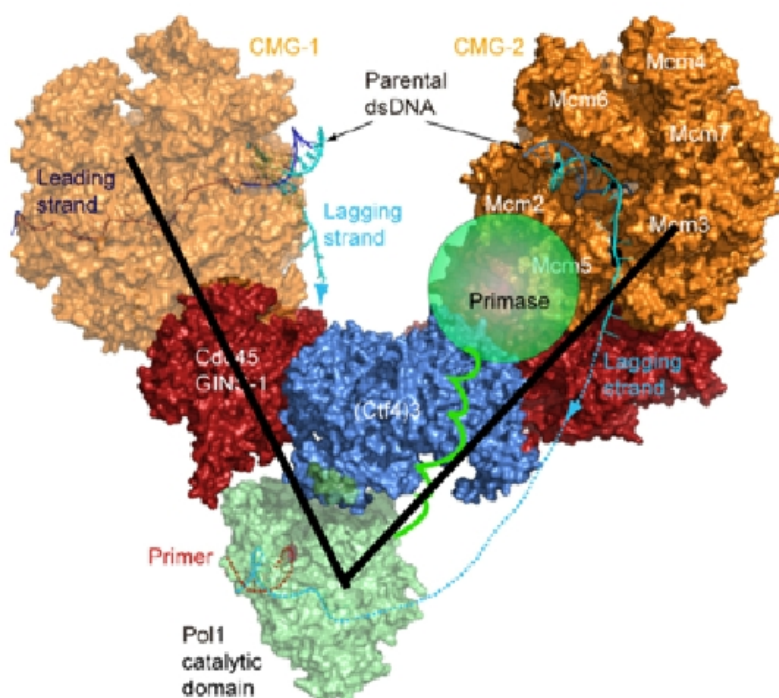

1276  
1277  
1278  
1279  
1280  
1281  
1282

**Figure 8 – figure supplement 1. The Pol1 and primase lobes of Pol  $\alpha$ -primase have a 70° range of motion.** The primase lobe of Pol  $\alpha$ -primase is shown as a semi-transparent sphere connected to Pol1 by a flexible linker. Assuming the primase lobe extends past the Ctf4 disk and resides near the CMGs, the black lines indicate a 70° angle to approximate the previously documented range of motion between the Pol and primase lobes (Nunez-Ramirez et al., 2011).

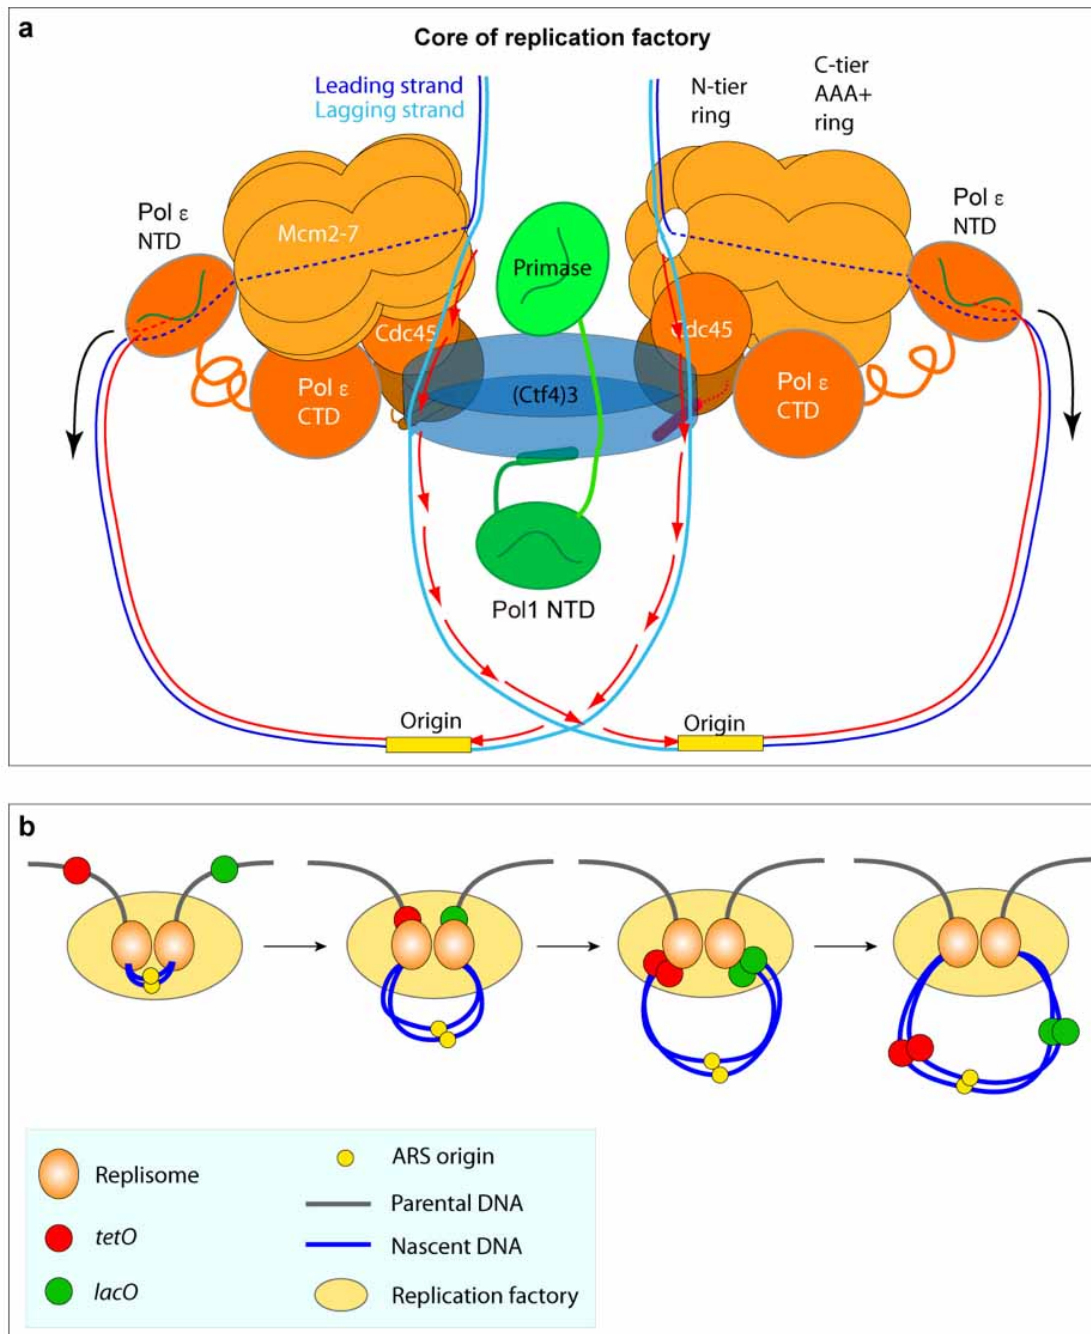

1283  
1284  
1285  
1286  
1287  
1288  
1289  
1290  
1291  
1292

**Figure 8 – figure supplement 2. Comparison of the proposed sister replisome core factory to conclusion of super-resolution image of marked DNA in cells. (a)** Cartoon of the structural model of a core replicon factory from the current report, along with DNA produced from one bidirectional origin. The black arrows indicate the direction of duplicated leading strand DNA propelled from the leading strand Pol  $\epsilon$  in the complex, and the red arrows correspond to the direction of lagging strand synthesis during Okazaki fragment extension. Panel **b** is adapted from **Fig. 1a** in Natsume and Tanaka, *Chromosome Research*, 2010, 18, 7-17.
